# Supplementary material for: Nomogram Predicts In-Hospital Mortality in Patients with Emergency Gastrointestinal Bleeding: A Multicenter Retrospective Study
Source: Research Square preprint supplement (doi:10.21203/rs.3.rs-4905124/v1), 2024-10-17
Supplement: Supplementary file 1 [file 529f0927086e214343ed67b7.xlsx]

## Sheet: SPSS~data~6.1
序号	性别	年龄	60岁及以上	来院方式	心率	收缩压	舒张压	急诊休克指数	预检分诊分级	医疗付费方式	入院月份	入院时间段	入院科室	实际住院天数	消化道出血类型	是否合并糖尿病	是否合并高血压	是否脑梗死	是否合并冠心病	是否合并肿瘤	住院期间是否行手术操作	是否进行止血手术	麻醉方式	是否24小时内止血手术	总费用	离院方式
1	2	75	1	2	81	121	88	0.669421	4	1	3	2	2	26	2	2	1	1	1	2	2	2	3	3	42765.9	0
2	2	79	1	5	90	94	39	0.957447	2	1	2	3	1	10	1	2	2	2	2	2	1	1	2	1	47574.1	0
3	1	75	1	1	122	98	42	1.2449	2	1	3	1	1	4	1	2	2	2	2	2	1	1	2	1	12297.8	0
4	1	76	1	5	66	147	56	0.44898	2	1	1	1	1	9	1	2	1	2	1	2	1	1	1	2	16636.8	0
5	1	60	2	1	92	116	88	0.793103	2	1	4	2	1	9	1	2	1	2	2	2	1	1	1	1	11742.7	0
6	1	59	2	1	140	120	70	1.16667	2	1	1	2	1	10	1	2	1	2	2	2	1	1	1	2	13310.5	0
7	1	68	1	2	83	112	61	0.741071	2	1	2	1	1	4	1	2	1	1	1	2	1	1	1	1	4875.74	0
8	1	61	1	1	121	104	43	1.16346	2	4	3	1	1	1	1	2	2	2	2	1	2	2	3	3	2387.59	1
9	2	73	1	1	68	138	69	0.492754	2	1	4	3	1	6	1	2	2	2	1	2	1	1	2	1	36764	0
10	1	91	1	1	120	88	51	1.36364	2	1	2	2	4	11	1	1	1	1	1	2	1	1	2	1	73652.5	0
11	1	53	2	1	85	104	71	0.817308	2	3	3	1	1	8	1	2	2	2	2	2	1	1	1	1	10944.4	0
12	1	77	1	4	97	164	74	0.591463	2	1	3	3	1	10	1	1	2	2	2	2	1	1	1	1	10987.2	0
13	1	68	1	2	138	100	61	1.38	2	1	4	1	1	8	1	2	1	2	2	2	1	1	1	1	12062.4	0
14	1	74	1	1	113	90	54	1.25556	2	1	3	1	1	6	1	1	2	1	2	1	2	2	3	3	10063.8	0
15	1	51	2	1	119	106	68	1.12264	2	2	4	2	1	8	1	1	2	2	2	2	1	2	3	3	13140.1	0
16	1	64	1	3	107	106	81	1.00943	2	1	2	1	1	6	1	2	2	2	1	2	1	1	1	1	9569.9	0
17	2	59	2	3	98	130	65	0.753846	2	1	3	1	1	10	1	2	2	2	2	2	1	1	1	1	15976.9	0
18	1	80	1	4	100	179	91	0.558659	2	1	2	2	5	29	1	2	2	2	1	2	1	1	2	1	48203.8	0
19	1	80	1	1	133	129	85	1.03101	2	1	4	1	1	6	1	1	1	2	1	2	2	2	3	3	10771.1	0
20	1	72	1	1	76	100	67	0.76	2	2	4	1	1	7	1	2	2	2	1	2	1	1	1	2	15132.2	0
21	1	59	2	1	69	127	84	0.543307	2	1	4	2	1	6	1	2	1	2	2	2	1	1	1	2	8696.14	0
22	2	86	1	5	89	89	45	1	2	1	4	1	1	8	1	1	1	1	1	1	1	1	1	1	14284.7	0
23	2	70	1	1	80	115	65	0.695652	2	1	3	2	1	5	2	2	2	2	2	2	2	2	3	3	10375.6	0
24	1	72	1	3	106	123	66	0.861789	2	1	1	2	1	5	1	2	1	2	1	2	1	1	2	1	9064.58	0
25	1	54	2	2	88	122	52	0.721311	3	1	4	2	1	5	2	1	2	2	2	2	1	1	1	1	14300.4	0
26	1	64	1	1	97	116	77	0.836207	2	1	2	1	1	3	1	2	2	2	2	2	1	1	1	2	9066.17	0
27	1	64	1	3	83	117	66	0.709402	2	1	2	2	1	4	1	2	2	2	2	2	2	2	3	3	7840.07	0
28	1	64	1	1	103	91	66	1.13187	2	1	3	1	1	5	1	2	2	2	2	2	2	2	3	3	10979.2	0
29	2	83	1	4	106	167	82	0.634731	3	1	2	2	1	6	1	2	1	2	2	2	1	1	2	1	7301.8	0
30	2	67	1	3	88	108	50	0.814815	2	1	1	1	1	5	1	2	2	2	2	2	1	1	1	2	9023.23	0
31	2	49	2	5	73	126	65	0.579365	2	1	4	1	1	6	2	2	2	2	2	2	1	1	1	1	7095.68	0
32	2	68	1	5	110	142	80	0.774648	2	1	4	3	1	16	1	2	1	2	2	1	1	1	1	1	25038.3	0
33	1	47	2	1	96	135	86	0.711111	2	3	4	2	1	4	1	2	2	2	2	2	1	1	1	1	3599.74	0
34	2	68	1	3	79	105	57	0.752381	2	1	1	2	1	5	1	2	2	1	2	2	1	1	2	2	9275.58	0
35	2	87	1	1	143	98	56	1.45918	2	1	3	2	4	6	2	2	1	1	1	2	1	2	3	3	35461.2	0
36	2	77	1	2	74	91	53	0.813187	4	1	2	2	1	5	1	2	2	1	1	2	2	2	3	3	12677.4	0
37	1	66	1	1	67	138	53	0.485507	2	1	3	1	1	8	1	2	1	2	2	1	1	1	1	2	28952.3	0
38	1	43	2	1	115	128	83	0.898438	2	1	3	3	1	8	1	2	1	2	2	2	1	1	2	1	16599.4	0
39	1	76	1	2	89	139	77	0.640288	2	1	4	1	1	4	1	2	1	2	2	2	1	1	1	2	5032.17	0
40	1	47	2	1	134	84	57	1.59524	2	1	1	1	1	6	1	2	2	2	2	2	1	1	1	1	11141.2	0
41	1	62	1	1	116	109	87	1.06422	2	1	4	2	1	1	1	1	2	2	2	2	2	2	3	3	809.01	1
42	1	29	2	2	149	151	96	0.986755	2	1	2	1	1	8	1	2	2	2	2	2	1	1	1	1	14735.5	0
43	2	74	1	2	80	135	74	0.592593	4	1	3	3	1	7	2	2	1	2	2	2	1	1	1	2	8137.13	0
44	1	58	2	4	100	110	51	0.909091	2	1	4	1	4	2	1	2	2	2	2	2	1	1	1	1	30208.5	0
45	1	62	1	4	68	126	51	0.539683	2	1	1	1	4	8	1	1	1	1	1	2	1	2	3	3	60863.7	0
46	1	25	2	2	88	133	69	0.661654	3	3	1	3	1	1	1	2	2	2	2	2	1	1	1	1	3191.29	0
47	1	87	1	4	96	119	90	0.806723	2	1	2	2	1	4	1	2	1	1	2	2	1	1	2	1	6803.51	0
48	2	73	1	2	78	129	77	0.604651	4	1	2	1	5	4	2	2	2	2	2	2	1	1	1	2	7499.45	0
49	2	69	1	1	72	158	84	0.455696	2	1	2	1	1	8	2	1	1	2	2	2	1	1	1	1	16701.9	0
50	1	86	1	5	70	168	76	0.416667	2	3	2	1	1	1	1	2	2	2	2	2	2	2	3	3	1039.41	0
51	1	47	2	3	139	93	53	1.49462	2	1	3	2	1	14	1	2	2	2	2	2	1	1	1	1	28954.8	0
52	1	82	1	2	110	142	76	0.774648	3	1	3	1	1	1	1	1	1	1	1	2	2	2	3	3	5195.02	0
53	1	56	2	2	82	98	68	0.836735	2	3	3	1	1	5	1	2	2	2	2	2	1	1	1	1	7632.97	0
54	1	62	1	3	86	124	62	0.693548	2	1	4	2	1	2	1	2	2	2	2	2	1	1	1	2	9664.77	0
55	2	62	1	2	67	169	77	0.39645	3	1	1	1	1	4	1	2	2	2	2	2	1	1	1	1	6657.23	0
56	1	60	2	5	120	132	78	0.909091	2	1	4	1	1	6	1	2	2	2	1	2	1	1	1	1	8256.29	0
57	2	54	2	3	86	124	75	0.693548	3	1	4	1	1	8	2	2	2	2	2	2	1	1	1	2	11389	0
58	1	37	2	2	73	175	98	0.417143	3	1	4	3	1	3	1	1	2	2	2	2	1	1	1	1	5022.86	0
59	1	59	2	5	95	136	65	0.698529	2	1	1	2	1	8	1	1	1	2	2	2	1	1	2	2	94622.8	0
60	1	68	1	1	89	127	83	0.700787	2	1	3	2	4	26	1	2	1	2	2	2	1	1	1	1	86484.8	0
61	1	79	1	1	93	99	63	0.939394	2	1	2	3	1	3	1	2	1	2	2	2	2	2	3	3	12008.8	0
62	1	59	2	2	80	100	60	0.8	4	1	3	1	3	6	1	2	1	2	1	1	2	2	3	3	4838.98	0
63	2	77	1	2	117	190	105	0.615789	2	1	3	1	1	11	1	1	2	2	2	2	1	1	1	1	18438.8	0
64	1	71	1	3	80	112	62	0.714286	2	1	3	2	5	11	1	2	1	2	1	2	1	1	1	1	19760.7	0
65	1	45	2	3	62	111	68	0.558559	2	1	2	2	4	7	1	2	1	2	2	1	2	2	3	3	8643.05	0
66	2	52	2	2	67	120	63	0.558333	2	1	2	2	1	5	1	2	1	2	2	2	1	1	2	2	7442.86	0
67	1	78	1	1	66	162	116	0.407407	1	1	3	1	4	14	1	1	2	2	2	2	1	1	1	1	57062.8	1
68	1	70	1	2	86	135	83	0.637037	2	1	3	2	1	6	2	2	2	2	2	2	1	1	1	2	7927.88	0
69	1	73	1	1	99	154	76	0.642857	2	2	4	1	1	6	1	1	1	1	2	2	2	2	3	3	14560.1	1
70	1	58	2	3	80	112	47	0.714286	2	1	1	3	1	3	1	1	2	2	2	2	1	1	1	1	9406.93	0
71	2	80	1	1	74	147	72	0.503401	2	1	2	2	1	13	1	2	2	2	2	2	1	1	1	2	39268.2	0
72	2	88	1	3	59	115	37	0.513043	2	1	3	1	4	1	1	2	1	1	1	2	1	2	3	3	11878	0
73	1	20	2	2	90	125	67	0.72	4	3	1	2	1	1	1	2	2	2	2	2	2	2	3	3	2068.98	0
74	1	65	1	3	86	135	60	0.637037	2	1	4	2	1	16	1	2	2	2	1	2	1	1	2	2	15619.3	0
75	2	64	1	5	90	94	41	0.957447	2	1	1	1	1	10	1	2	2	2	2	2	1	1	1	2	26823.9	0
76	2	48	2	5	94	105	62	0.895238	2	1	1	1	1	15	1	2	2	2	2	2	1	1	1	1	48515	0
77	1	68	1	2	97	143	81	0.678322	4	1	3	2	1	12	1	2	1	2	1	1	1	1	2	1	10852.2	0
78	1	92	1	1	76	117	60	0.649573	2	1	4	1	1	5	1	1	2	1	2	2	2	2	3	3	12406.6	0
79	1	60	2	2	96	150	78	0.64	2	1	3	1	1	11	2	1	1	2	1	2	1	1	1	1	31988.3	0
80	2	25	2	2	98	136	80	0.720588	3	1	4	2	5	4	1	2	2	2	2	2	1	1	1	2	5832.77	0
81	1	47	2	4	89	166	113	0.536145	2	1	1	2	1	6	1	2	2	2	2	2	1	1	2	1	15355.4	0
82	1	64	1	5	97	153	61	0.633987	2	1	2	2	1	3	1	1	1	2	2	2	1	1	1	1	6518.48	0
83	2	61	1	5	111	143	85	0.776224	3	1	1	3	1	11	1	2	2	2	2	2	1	1	2	1	88938.9	0
84	1	73	1	1	101	113	52	0.893805	2	1	3	2	1	9	1	2	1	2	2	2	1	1	1	1	12255.5	0
85	1	88	1	1	104	129	65	0.806202	2	1	4	2	1	6	1	2	2	2	2	1	2	2	3	3	15271.3	0
86	2	85	1	1	116	137	80	0.846715	2	1	3	3	4	2	1	1	1	1	1	2	1	2	3	3	16900.4	0
87	1	95	1	1	73	127	70	0.574803	2	3	4	2	1	8	2	1	1	2	2	2	1	1	2	2	17214.8	0
88	1	76	1	5	81	188	90	0.430851	3	1	2	2	1	14	1	2	1	2	1	1	2	2	3	3	17119.2	1
89	2	55	2	1	75	91	59	0.824176	2	1	3	1	1	18	1	2	2	2	2	2	1	1	2	2	67118.2	0
90	1	76	1	2	76	87	52	0.873563	4	1	4	1	4	3	1	2	2	2	1	1	1	2	3	3	30745.9	0
91	1	55	2	5	88	122	64	0.721311	2	1	1	2	1	8	2	2	1	2	2	2	1	1	2	1	13634.6	0
92	1	62	1	5	88	122	64	0.721311	2	1	2	1	2	16	2	2	2	1	2	2	1	1	1	1	61636.7	0
93	1	49	2	1	120	101	58	1.18812	2	1	1	3	1	62	1	2	2	2	2	2	1	1	1	1	328769	0
94	1	79	1	2	66	120	49	0.55	4	1	2	2	1	5	1	2	2	2	1	2	1	2	3	3	15665.6	0
95	1	74	1	1	94	134	95	0.701493	2	1	1	1	1	9	2	2	2	2	1	2	1	1	2	1	13187.4	0
96	1	39	2	3	112	100	65	1.12	2	4	2	2	1	9	1	2	2	2	2	2	1	1	1	1	10558.2	0
97	1	77	1	1	82	142	79	0.577465	2	1	1	2	1	3	1	1	2	2	2	2	1	1	1	1	6700.06	0
98	1	70	1	3	100	166	90	0.60241	2	1	4	1	1	1	1	1	1	2	2	2	2	2	3	3	6510.91	0
99	1	64	1	2	105	86	59	1.22093	2	1	2	1	1	5	1	2	2	2	1	2	1	1	1	1	9012.2	0
100	1	63	1	1	110	88	55	1.25	2	1	1	1	4	3	1	2	2	2	2	2	1	1	1	1	34797.4	0
101	2	61	1	4	110	74	49	1.48649	2	1	1	2	1	9	2	2	2	2	1	2	1	1	1	1	17888.7	1
102	2	61	1	2	75	131	85	0.572519	3	1	2	2	1	8	1	2	2	2	1	2	1	1	1	1	13899.9	0
103	1	63	1	3	87	144	72	0.604167	2	1	3	3	5	7	1	2	2	2	2	2	1	1	1	2	19481.1	0
104	1	33	2	2	83	122	83	0.680328	2	3	2	2	1	3	1	2	2	2	2	1	1	1	1	1	6730.37	0
105	2	72	1	1	77	94	60	0.819149	2	1	3	1	1	4	1	2	1	2	2	1	1	1	1	1	8166.74	0
106	2	66	1	1	107	86	41	1.24419	2	1	1	1	1	7	1	2	2	2	2	2	1	1	1	2	8987.39	0
107	1	34	2	3	117	97	64	1.20619	1	1	2	1	1	5	1	2	2	2	2	2	1	1	1	1	5628.55	0
108	1	78	1	1	91	132	56	0.689394	2	1	1	2	1	12	1	2	2	2	2	1	1	1	1	1	16413.4	0
109	1	66	1	1	108	117	66	0.923077	2	1	3	1	1	7	1	1	2	2	2	1	1	1	2	1	48534.3	0
110	1	81	1	5	65	151	70	0.430464	2	1	1	1	1	7	1	2	1	1	1	2	1	1	1	2	28487	0
111	1	81	1	5	65	151	70	0.430464	2	1	1	1	1	3	1	2	1	1	1	2	2	2	3	3	8783.4	0
112	2	55	2	2	102	91	52	1.12088	2	1	2	3	5	4	1	2	1	2	2	2	1	1	2	1	6745.39	0
113	1	57	2	4	90	86	53	1.04651	1	1	1	1	1	13	1	2	2	2	2	2	1	2	3	3	117864	0
114	1	64	1	3	94	121	68	0.77686	2	1	2	2	1	9	1	2	1	1	2	2	1	1	2	1	7463.86	0
115	1	47	2	2	84	106	77	0.792453	2	1	2	1	4	12	1	2	2	2	2	2	1	1	1	1	120181	0
116	1	55	2	1	93	108	73	0.861111	2	1	1	2	1	7	1	2	2	2	2	2	1	1	1	2	8440.04	0
117	1	62	1	1	102	150	82	0.68	2	1	2	2	1	10	2	2	1	1	2	2	2	2	3	3	32849	0
118	1	37	2	5	139	206	142	0.674757	2	1	2	3	1	5	1	1	1	2	2	2	2	2	3	3	7014.26	0
119	2	67	1	3	110	129	48	0.852713	2	1	3	2	4	8	1	2	2	2	2	2	1	1	2	1	28717.1	0
120	1	42	2	3	68	104	75	0.653846	2	1	3	2	1	7	1	2	2	2	2	2	1	1	1	2	13550.5	0
121	1	31	2	3	106	140	78	0.757143	2	3	2	3	1	3	1	2	2	2	2	2	1	1	1	1	5364.92	0
122	1	64	1	1	99	95	63	1.04211	2	1	3	1	1	7	1	1	2	2	2	2	1	1	1	2	11985.2	0
123	2	30	2	2	88	94	63	0.93617	2	1	3	2	1	5	2	2	2	2	2	2	1	1	1	1	10177.9	0
124	1	67	1	2	107	99	60	1.08081	3	1	3	1	1	8	1	2	2	2	2	2	1	1	1	1	9420.26	0
125	1	63	1	5	94	117	70	0.803419	3	1	4	1	1	8	1	2	2	2	2	1	1	1	1	1	13119.3	0
126	2	74	1	1	103	121	70	0.85124	2	1	4	1	1	11	1	2	1	2	1	2	1	1	2	1	30383.7	0
127	1	52	2	3	104	140	96	0.742857	2	1	3	2	5	8	1	2	1	2	1	2	1	1	1	1	10002.9	0
128	1	59	2	1	81	94	56	0.861702	2	1	3	1	4	6	1	2	2	2	2	2	1	1	1	1	45695.9	0
129	1	59	2	1	141	179	137	0.787709	2	1	3	1	1	4	1	2	2	2	2	2	1	1	1	2	23580.1	0
130	2	81	1	1	98	158	80	0.620253	2	1	4	3	1	11	1	1	1	1	2	2	2	2	3	3	11695.3	0
131	1	56	2	1	72	128	75	0.5625	2	1	4	2	1	4	1	2	2	2	2	2	1	1	1	2	9651.41	0
132	2	77	1	5	77	118	59	0.652542	2	1	1	3	1	14	1	2	2	2	2	2	1	1	1	1	112476	1
133	1	63	1	1	70	125	78	0.56	2	1	4	3	1	8	2	1	1	1	2	2	1	1	2	1	9388.45	0
134	1	61	1	3	70	114	76	0.614035	2	1	2	2	1	7	1	2	1	2	2	2	1	1	1	1	10672.5	0
135	2	55	2	2	115	146	71	0.787671	3	1	4	2	1	6	1	2	2	2	2	2	1	1	2	1	6496.44	0
136	1	54	2	5	102	88	59	1.15909	2	1	4	2	5	8	1	2	1	2	2	2	2	2	3	3	6538	0
137	2	73	1	1	77	123	65	0.626016	4	1	1	1	1	8	1	2	2	2	2	2	1	1	1	2	15266.9	0
138	1	68	1	1	107	116	63	0.922414	3	1	4	2	1	7	1	1	1	2	1	2	1	1	1	2	22457.6	0
139	1	54	2	2	119	101	72	1.17822	2	1	2	1	1	7	1	2	2	2	2	2	1	1	1	1	10549.6	0
140	1	56	2	2	98	86	74	1.13953	2	1	3	2	4	29	1	2	2	2	2	1	1	1	1	1	103802	1
141	2	61	1	2	70	141	64	0.496454	4	1	2	1	1	6	1	2	2	2	1	2	1	1	1	2	11854.4	0
142	1	61	1	1	88	105	72	0.838095	2	2	4	1	5	1	1	1	2	1	1	1	2	2	3	3	1103.35	0
143	2	52	2	3	120	97	71	1.23711	2	1	2	3	1	3	1	2	2	2	2	2	1	1	1	1	5776.38	0
144	1	63	1	1	135	93	58	1.45161	2	1	1	1	5	20	1	2	2	2	2	2	1	1	2	1	32920.7	0
145	1	53	2	1	100	105	71	0.952381	2	4	1	2	4	5	1	2	2	2	2	2	1	1	1	1	35561.1	0
146	1	53	2	1	111	111	61	1	2	4	3	3	1	3	1	2	2	2	2	2	2	2	3	3	4909.3	0
147	1	45	2	2	74	128	78	0.578125	4	1	2	1	5	19	1	1	1	2	2	2	1	1	2	2	14213.4	0
148	2	83	1	1	96	85	55	1.12941	2	1	4	2	1	11	1	2	1	1	2	2	2	2	3	3	18384.2	0
149	1	64	1	2	109	97	59	1.12371	2	1	3	1	1	3	1	2	1	1	2	2	2	2	3	3	2948.01	0
150	1	65	1	2	116	141	96	0.822695	2	1	3	1	1	4	1	2	2	1	2	2	1	1	1	1	6367.32	0
151	2	70	1	1	72	95	53	0.757895	2	1	2	1	1	6	1	2	2	2	2	2	1	1	1	2	29101.8	0
152	2	70	1	1	61	122	56	0.5	2	1	3	1	1	7	1	2	2	2	2	2	1	1	1	2	30904.8	0
153	2	70	1	1	80	161	111	0.496894	2	1	4	2	1	6	1	2	2	2	2	2	1	1	1	1	15479.3	0
154	1	44	2	2	84	135	86	0.622222	4	1	4	3	1	3	2	2	2	2	2	2	1	1	1	1	5134.07	0
155	1	77	1	1	96	132	79	0.727273	2	1	4	1	1	4	1	2	1	2	1	2	2	2	3	3	9234.16	0
156	1	64	1	1	97	70	40	1.38571	1	1	4	2	4	1	1	1	2	2	1	2	1	2	3	3	9115.71	1
157	1	87	1	4	107	129	70	0.829457	2	1	4	1	1	5	1	1	2	2	2	2	1	1	2	1	10974.1	0
158	1	75	1	4	123	109	59	1.12844	2	1	2	2	1	6	1	2	1	1	2	2	2	2	3	3	11817.1	0
159	1	24	2	5	95	100	51	0.95	2	3	4	1	1	4	1	2	2	2	2	2	1	1	1	1	5586.39	0
160	1	78	1	1	99	157	64	0.630573	2	1	4	1	1	16	1	2	1	1	2	1	2	2	3	3	15834.6	0
161	1	60	2	2	80	124	62	0.645161	3	1	1	2	1	7	1	2	1	2	2	2	1	1	1	1	11267.4	0
162	1	75	1	4	111	154	104	0.720779	2	1	4	2	1	6	1	2	1	1	2	2	2	2	3	3	9156.74	0
163	1	58	2	2	92	146	82	0.630137	3	1	4	2	1	5	1	1	1	2	2	2	2	2	3	3	5363.95	0
164	1	65	1	1	113	102	65	1.10784	3	1	4	2	1	4	1	2	2	2	2	1	2	2	3	3	8120.13	0
165	1	72	1	2	71	140	55	0.507143	4	1	3	2	1	5	2	2	2	2	1	1	1	1	2	2	4153.49	0
166	1	61	1	1	95	113	75	0.840708	2	1	3	3	5	11	1	1	1	1	2	2	2	2	3	3	26361.5	0
167	1	76	1	1	78	112	56	0.696429	2	2	4	2	1	7	1	2	2	2	1	2	1	1	2	2	10733	0
168	1	60	2	2	133	114	69	1.16667	2	1	3	3	1	3	2	2	2	2	2	1	1	1	2	1	3395.05	1
169	1	41	2	5	88	85	50	1.03529	2	1	4	2	1	6	1	2	2	2	2	2	1	1	2	1	8556.41	0
170	2	54	2	3	134	124	82	1.08065	2	2	4	1	1	4	1	2	2	2	2	2	1	1	1	2	6842.34	0
171	2	55	2	1	115	104	39	1.10577	2	1	2	2	1	10	1	2	2	2	2	2	1	1	2	2	19017.2	0
172	1	86	1	5	94	130	79	0.723077	2	1	1	1	1	6	1	2	1	2	2	2	1	1	2	2	12094.3	0
173	2	70	1	1	83	102	52	0.813725	2	1	3	1	1	9	1	2	2	1	2	2	1	1	1	2	30944.5	0
174	1	52	2	3	100	108	52	0.925926	2	1	2	3	1	2	2	2	2	2	2	2	2	2	3	3	7511.51	0
175	2	43	2	2	73	137	57	0.532847	4	3	2	1	1	5	1	2	2	2	2	2	1	1	1	2	8022.11	0
176	1	43	2	1	100	111	74	0.900901	3	1	2	2	1	6	1	2	2	2	2	1	1	1	1	2	13772.1	0
177	1	33	2	1	79	107	69	0.738318	2	1	1	1	1	12	1	2	2	2	2	2	1	1	1	1	62915.6	0
178	1	49	2	1	82	152	87	0.539474	2	1	4	3	1	8	1	2	2	2	2	2	1	1	2	1	11428.1	0
179	1	39	2	5	126	114	73	1.10526	2	1	4	2	1	5	1	2	2	2	2	2	1	1	1	1	6378.72	0
180	2	37	2	1	86	101	76	0.851485	2	1	3	3	1	6	1	2	2	2	2	2	2	2	3	3	12695.5	0
181	1	14	2	3	101	114	67	0.885965	2	1	1	3	1	8	1	2	2	2	2	2	1	1	2	2	12699.5	0
182	1	71	1	1	84	78	20	1.07692	1	1	1	1	1	13	1	2	2	2	2	1	1	1	2	2	24456	1
183	1	73	1	1	129	78	50	1.65385	2	1	1	1	1	7	1	2	2	2	1	2	1	1	1	1	14637.8	0
184	2	61	1	3	84	111	68	0.756757	2	1	4	2	1	16	1	1	2	2	2	2	1	1	1	1	31692.9	0
185	1	76	1	5	98	109	64	0.899083	2	1	1	2	5	7	1	2	1	2	2	2	1	1	1	2	20737.3	0
186	1	74	1	1	74	140	77	0.528571	2	1	1	1	1	3	2	1	1	1	1	2	2	2	3	3	8109.46	0
187	1	74	1	3	77	197	115	0.390863	2	1	4	1	1	9	1	2	2	2	2	1	2	2	3	3	16084.8	0
188	2	85	1	1	93	134	57	0.69403	2	1	1	1	1	8	1	2	2	2	2	2	1	1	1	1	38249.4	0
189	2	90	1	5	78	144	69	0.541667	2	1	2	1	1	3	1	1	2	2	2	2	1	1	1	1	5147.68	0
190	2	72	1	2	107	163	87	0.656442	3	1	3	1	1	4	1	2	2	2	1	2	1	1	1	1	8634.32	0
191	1	67	1	3	77	126	80	0.611111	2	1	1	1	1	6	1	1	1	2	2	2	1	1	1	1	8330.13	0
192	2	76	1	1	100	149	80	0.671141	2	1	1	3	4	4	1	1	1	1	1	2	1	2	3	3	32040	0
193	1	46	2	5	128	121	85	1.05785	2	1	2	1	1	80	1	2	2	2	2	2	1	1	1	2	373645	0
194	1	40	2	1	85	155	86	0.548387	2	1	3	3	5	5	1	1	2	2	1	2	2	2	3	3	11057.8	0
195	2	47	2	3	93	121	76	0.768595	2	1	1	1	1	4	1	2	1	2	2	2	1	1	1	1	4001.52	0
196	1	60	2	5	105	107	50	0.981308	2	1	1	1	1	8	1	2	1	1	2	2	1	1	1	1	12785.7	0
197	2	32	2	2	86	99	66	0.868687	2	3	3	2	1	6	1	2	2	2	2	2	1	1	1	2	8131.32	0
198	2	58	2	3	89	168	75	0.529762	2	1	2	1	1	8	1	2	2	2	2	1	2	2	3	3	15045.9	0
199	1	50	2	2	108	105	68	1.02857	2	1	3	1	1	5	1	2	2	2	2	2	2	2	3	3	4886.35	0
200	2	84	1	1	84	126	81	0.666667	2	1	3	1	1	12	1	1	1	2	1	2	1	1	2	2	109212	0
201	2	29	2	2	98	120	75	0.816667	3	1	2	2	5	2	2	2	2	2	2	2	1	1	1	2	4335.01	0
202	2	73	1	4	70	102	59	0.686275	2	1	1	3	1	17	2	1	1	2	2	2	1	1	1	2	70341.8	0
203	1	57	2	3	118	119	85	0.991597	2	1	1	2	1	10	1	2	1	2	2	2	1	1	1	2	14356.7	0
204	1	66	1	2	116	123	82	0.943089	2	1	3	1	1	2	1	2	1	2	2	2	2	2	3	3	2004.2	0
205	2	48	2	2	100	121	75	0.826446	3	1	4	2	5	3	2	2	2	2	2	2	1	1	1	2	4889.65	0
206	1	72	1	2	120	109	64	1.10092	2	1	1	1	1	4	1	2	2	2	1	2	2	2	3	3	7221.26	0
207	1	92	1	1	116	131	76	0.885496	2	1	4	1	1	9	1	2	2	1	2	2	1	2	3	3	13492	0
208	1	92	1	1	120	112	63	1.07143	2	1	4	2	1	6	1	2	2	1	2	2	2	2	3	3	10590.5	0
209	1	93	1	1	118	92	58	1.28261	2	1	1	3	1	7	1	2	2	1	2	2	2	2	3	3	14163.6	0
210	1	76	1	3	87	122	70	0.713115	2	1	2	2	2	17	1	2	1	2	2	2	1	1	1	1	95084.9	0
211	1	75	1	1	104	102	74	1.01961	2	1	2	2	1	12	1	2	2	2	2	2	1	1	2	2	23395.1	0
212	2	81	1	2	90	84	56	1.07143	2	1	2	2	1	3	1	2	2	2	1	2	2	2	3	3	5951.58	0
213	1	45	2	1	87	190	140	0.457895	2	2	4	1	4	1	2	2	2	2	2	2	1	1	2	1	30223.9	1
214	1	69	1	1	99	128	69	0.773438	2	1	1	1	1	6	1	2	1	2	2	2	1	1	1	1	14356.2	0
215	1	55	2	1	122	142	98	0.859155	2	1	1	2	1	4	1	1	2	2	2	2	1	1	2	2	10611	0
216	1	64	1	3	91	191	92	0.47644	2	1	3	2	1	11	1	2	1	2	2	1	1	1	1	1	19601	0
217	1	60	2	2	83	133	95	0.62406	4	1	2	2	1	6	1	2	2	2	2	1	1	1	1	1	11407.8	0
218	1	81	1	3	91	191	92	0.47644	2	1	1	1	1	10	1	2	1	2	2	2	1	1	1	2	45353.7	0
219	1	82	1	1	58	108	60	0.537037	2	1	4	2	1	3	1	2	1	2	2	2	2	2	3	3	6776.15	0
220	1	84	1	1	73	86	45	0.848837	2	1	2	1	1	1	1	2	2	2	1	1	1	2	3	3	14591.1	0
221	1	81	1	2	82	184	91	0.445652	2	1	3	1	1	9	1	1	1	2	2	1	1	1	1	1	10674	0
222	1	62	1	5	101	155	74	0.651613	2	1	1	1	1	3	1	2	1	2	2	2	1	1	1	2	7814.98	0
223	2	88	1	1	75	120	68	0.625	2	1	3	1	1	6	2	2	1	2	2	2	2	2	3	3	9935.93	0
224	1	81	1	5	112	128	92	0.875	2	1	4	1	2	4	1	2	2	2	2	1	1	1	1	2	7018.66	0
225	2	64	1	1	75	120	68	0.625	2	1	3	2	1	2	1	2	1	2	2	2	1	1	2	1	7812.74	0
226	1	62	1	3	85	132	58	0.643939	2	1	1	2	1	7	2	2	1	1	1	2	1	1	1	2	18191.6	0
227	2	73	1	3	101	166	88	0.608434	3	1	3	2	1	6	1	1	2	2	2	2	1	1	1	1	18054.9	0
228	1	59	2	2	83	123	66	0.674797	3	1	2	2	1	12	1	1	1	2	1	2	1	1	2	2	13011.8	0
229	2	57	2	3	94	103	65	0.912621	2	1	3	2	2	2	1	2	2	2	2	2	1	2	3	3	9900.91	0
230	1	81	1	1	92	109	62	0.844037	2	1	2	1	1	7	1	2	2	2	2	1	2	2	3	3	15428.5	0
231	1	88	1	2	95	117	49	0.811966	4	1	1	2	1	4	1	2	1	2	2	2	1	1	1	2	11607.6	0
232	1	67	1	1	92	109	62	0.844037	2	2	4	1	5	1	1	1	1	2	1	2	2	2	3	3	10248.2	1
233	1	76	1	1	90	99	62	0.909091	2	1	3	2	4	5	1	2	2	1	1	2	1	2	3	3	43529.6	0
234	2	80	1	5	165	117	91	1.41026	2	2	4	1	5	7	1	2	2	2	2	2	2	2	3	3	16061.1	0
235	2	79	1	1	87	112	54	0.776786	2	1	1	1	1	7	1	2	1	2	2	2	1	1	1	1	12697.7	0
236	1	27	2	2	77	128	77	0.601562	3	1	3	2	1	8	1	2	2	2	2	2	1	1	1	2	27800.7	0
237	2	72	1	2	101	151	72	0.668874	2	1	1	3	1	7	1	2	2	1	2	2	1	1	1	1	7946.35	0
238	2	73	1	1	110	105	64	1.04762	2	1	4	1	2	21	1	2	2	2	2	2	1	1	1	2	38322.6	0
239	1	75	1	1	97	155	88	0.625806	2	1	3	1	1	6	1	2	1	2	2	2	1	1	2	1	6842.38	0
240	2	69	1	4	100	89	42	1.1236	2	1	3	2	1	7	1	2	2	2	2	1	1	1	1	1	57624.4	1
241	1	65	1	1	92	127	83	0.724409	2	1	2	1	1	7	1	2	2	2	2	1	1	1	1	2	14330.7	0
242	1	54	2	2	59	140	100	0.421429	4	1	2	2	5	4	1	2	2	2	2	2	1	1	1	2	9411.66	0
243	2	81	1	1	77	121	72	0.636364	2	1	1	1	1	8	1	1	2	1	1	2	2	2	3	3	19440.3	0
244	2	54	2	3	87	152	88	0.572368	2	1	4	3	1	9	1	2	1	2	2	2	1	1	1	1	13211.9	0
245	1	74	1	5	108	131	93	0.824427	2	1	2	1	1	9	1	2	2	2	1	2	1	1	1	1	16129.5	0
246	1	54	2	5	159	122	75	1.30328	2	1	4	1	1	10	1	2	2	2	2	2	1	1	1	2	22281.9	0
247	1	54	2	1	67	105	58	0.638095	2	1	4	2	1	5	1	2	2	2	2	2	1	1	1	1	32968.2	0
248	1	54	2	3	101	103	58	0.980583	2	1	1	2	1	4	1	2	2	2	2	2	2	2	3	3	6992.37	0
249	1	54	2	1	109	106	55	1.0283	2	1	2	1	1	3	1	2	2	2	2	2	2	2	3	3	10549.6	0
250	1	54	2	3	113	95	54	1.18947	2	1	2	2	1	6	1	2	2	2	2	2	2	2	3	3	14972.2	0
251	1	59	2	1	89	108	63	0.824074	2	1	1	1	1	6	1	2	2	2	1	2	1	1	2	1	11980.3	0
252	1	34	2	3	78	99	46	0.787879	2	1	1	3	1	5	1	2	1	2	2	2	1	1	2	1	5363.68	0
253	2	62	1	3	91	173	87	0.526012	2	4	3	2	1	8	1	2	2	2	2	1	1	1	1	1	12145.5	0
254	1	84	1	1	120	118	58	1.01695	2	1	3	2	1	5	1	2	1	2	1	2	1	1	1	2	7512.4	0
255	1	28	2	1	91	84	42	1.08333	2	1	1	3	4	1	1	2	2	2	2	2	1	1	1	1	79404.2	0
256	2	72	1	5	105	137	62	0.766423	2	1	4	2	1	6	1	2	2	2	2	2	1	1	1	2	15088.6	0
257	2	73	1	4	97	98	38	0.989796	2	1	4	3	1	6	1	2	2	2	2	2	1	1	1	1	25033.9	0
258	1	76	1	5	1110	129	54	8.60465	2	2	4	2	1	1	1	2	2	2	2	2	2	2	3	3	4779.54	0
259	1	63	1	5	78	86	54	0.906977	2	1	3	1	4	1	1	1	2	2	2	2	1	1	1	1	40271.1	1
260	2	80	1	1	74	126	70	0.587302	2	1	3	2	1	5	1	1	1	2	2	2	1	1	1	1	9777.4	0
261	1	44	2	5	85	123	86	0.691057	2	1	1	1	1	5	1	2	2	2	2	2	1	1	1	1	9011.98	0
262	1	61	1	1	69	108	54	0.638889	2	1	4	1	1	19	1	2	1	2	2	2	1	1	1	1	100575	0
263	2	86	1	1	89	114	54	0.780702	2	1	4	2	1	12	1	1	1	1	1	2	2	2	3	3	12634	0
264	1	51	2	3	82	133	85	0.616541	2	1	3	2	1	9	1	2	1	2	2	2	1	1	2	1	8582.72	0
265	1	66	1	1	74	158	79	0.468354	2	1	3	2	4	19	1	2	2	2	2	2	1	1	1	2	48865.3	0
266	1	51	2	1	104	127	78	0.818898	2	2	4	2	4	11	1	1	1	2	2	2	1	1	2	1	123167	0
267	1	58	2	1	78	170	93	0.458824	2	1	2	2	1	6	1	2	2	2	1	2	1	1	1	1	15130.7	0
268	1	43	2	1	100	113	76	0.884956	2	1	3	1	1	2	1	2	2	2	2	2	1	1	1	2	6037.79	0
269	2	70	1	1	96	155	69	0.619355	2	1	1	1	5	3	1	2	1	2	1	2	1	2	3	3	4817.8	0
270	1	77	1	1	116	145	67	0.8	2	1	2	2	1	6	1	2	1	2	2	2	1	1	1	1	14417.1	0
271	1	72	1	2	86	129	88	0.666667	2	1	1	2	1	11	1	2	1	1	2	2	1	2	3	3	105182	0
272	1	25	2	1	114	116	71	0.982759	2	1	2	2	1	6	1	2	2	2	2	2	1	1	1	1	10481.1	0
273	1	87	1	1	85	98	57	0.867347	2	1	4	2	1	6	2	2	1	1	1	2	2	2	3	3	8667.2	0
274	1	83	1	4	89	142	68	0.626761	2	1	2	1	1	10	1	1	1	1	2	2	1	2	3	3	32196.5	0
275	1	48	2	2	102	110	68	0.927273	2	1	3	2	1	6	1	2	2	2	2	2	1	1	1	1	21226.7	0
276	2	72	1	4	102	131	62	0.778626	2	1	3	2	1	18	1	2	2	1	2	2	1	1	1	1	38722.6	0
277	1	76	1	3	86	128	88	0.671875	2	1	3	1	1	7	1	2	1	2	1	2	1	1	2	1	9939.8	0
278	1	61	1	2	130	105	73	1.2381	2	1	3	1	1	6	1	2	1	2	1	2	1	1	2	1	7845.33	0
279	1	71	1	1	99	128	64	0.773438	2	1	1	1	1	8	1	2	2	1	2	2	2	2	3	3	14299.5	0
280	2	20	2	2	67	105	72	0.638095	3	3	2	2	1	1	1	2	2	2	2	2	1	1	1	1	2581.01	0
281	1	74	1	1	88	102	48	0.862745	2	1	1	1	1	7	1	2	1	1	2	2	2	2	3	3	11367.7	0
282	1	47	2	5	97	126	69	0.769841	2	1	1	1	4	3	1	2	2	2	2	2	1	1	1	1	23852.7	0
283	1	48	2	2	84	109	64	0.770642	2	1	2	2	1	6	1	2	2	2	2	2	1	1	1	1	21046.1	0
284	1	33	2	2	94	153	96	0.614379	4	1	3	3	5	5	1	2	2	2	2	2	1	1	1	2	6256.03	0
285	1	51	2	1	116	158	95	0.734177	2	1	2	1	1	4	1	1	1	2	1	2	1	1	2	1	8230.01	0
286	1	91	1	1	116	158	95	0.734177	2	1	2	2	4	3	1	2	1	2	1	1	1	2	3	3	12957.8	0
287	1	74	1	1	91	142	94	0.640845	2	1	4	2	1	10	1	2	2	2	2	2	1	1	2	1	16909	0
288	2	58	2	1	91	142	94	0.640845	2	1	2	1	1	17	1	2	1	2	2	2	1	1	1	2	37395.6	0
289	2	89	1	5	112	119	75	0.941176	2	1	1	1	1	15	1	2	2	2	2	1	1	1	1	1	26073.3	0
290	1	43	2	2	98	113	71	0.867257	2	1	4	2	1	6	1	2	2	2	1	2	1	1	1	2	10287.4	0
291	1	75	1	1	96	115	61	0.834783	2	1	2	1	1	7	1	2	2	2	2	2	1	1	2	1	20162.3	0
292	1	75	1	1	71	137	85	0.518248	1	1	2	1	1	4	1	2	2	2	2	2	1	1	1	2	10000.5	0
293	2	56	2	2	82	128	77	0.640625	4	1	3	2	1	20	1	2	2	2	2	2	1	1	2	1	49055.7	0
294	1	84	1	1	93	125	72	0.744	2	1	1	2	1	5	1	2	1	2	1	2	1	1	1	1	9553.16	0
295	1	56	2	1	116	89	61	1.30337	2	1	1	2	4	5	1	2	2	2	2	2	1	1	1	2	14120.4	0
296	2	34	2	1	113	101	60	1.11881	2	2	4	1	4	8	1	2	2	2	2	2	1	1	1	1	41331.9	0
297	1	39	2	1	105	112	62	0.9375	2	4	1	3	1	4	1	2	2	2	2	2	1	1	1	1	6147.1	0
298	1	91	1	5	100	117	91	0.854701	2	1	3	2	1	7	1	1	1	2	1	2	2	2	3	3	9215.54	0
299	1	56	2	1	94	87	55	1.08046	2	1	4	2	1	7	1	1	2	2	2	2	1	1	1	2	23640.1	0
300	1	74	1	3	71	149	66	0.47651	2	1	3	1	1	6	1	2	2	2	2	2	1	1	2	2	5829.36	0
301	1	28	2	2	116	133	86	0.87218	4	1	4	2	1	3	1	2	2	2	2	2	1	1	1	1	5956.85	0
302	1	23	2	2	88	111	69	0.792793	2	1	1	1	1	6	1	2	2	2	2	2	1	1	1	1	11497.7	0
303	2	57	2	1	71	145	48	0.489655	2	2	4	2	1	8	1	1	2	2	2	1	1	1	1	1	38108.5	0
304	2	60	2	5	68	99	60	0.686869	2	1	2	2	4	8	1	2	2	2	2	2	1	1	2	1	23006.3	0
305	1	65	1	2	118	112	75	1.05357	2	1	3	1	1	6	1	2	2	2	1	2	1	1	1	1	14219.6	0
306	1	61	1	1	95	96	67	0.989583	2	1	3	3	5	3	1	1	1	2	2	2	2	2	3	3	5440.71	0
307	2	57	2	5	107	91	57	1.17582	2	1	3	1	1	6	1	2	2	2	2	1	2	2	3	3	10993.4	0
308	1	66	1	1	80	103	72	0.776699	2	1	2	1	5	16	1	2	2	2	2	1	1	1	1	2	50458.8	0
309	1	65	1	1	80	111	59	0.720721	1	1	1	1	1	13	1	1	2	2	2	2	1	1	1	2	91542.3	0
310	2	72	1	5	83	115	66	0.721739	2	1	2	3	1	5	2	1	2	2	2	2	1	1	1	1	17802.3	0
311	2	80	1	1	81	162	51	0.5	2	1	2	2	1	10	1	2	2	2	2	2	1	1	1	2	35153.2	0
312	1	74	1	1	88	188	103	0.468085	2	1	3	2	1	9	1	1	1	2	1	2	2	2	3	3	24087.5	0
313	1	60	2	2	91	134	80	0.679104	3	1	2	1	1	5	1	2	1	2	2	2	1	1	1	1	7409.73	0
314	2	70	1	2	86	115	77	0.747826	2	1	2	1	1	2	1	2	2	2	1	2	1	1	1	1	6450.76	0
315	2	84	1	1	99	89	46	1.11236	2	1	1	3	1	6	1	2	1	2	2	1	2	2	3	3	7616.42	0
316	2	84	1	1	87	142	81	0.612676	2	1	3	3	1	4	1	2	1	1	2	1	2	2	3	3	5502.11	0
317	1	68	1	1	147	187	119	0.786096	2	1	3	2	1	4	1	1	1	2	1	2	1	2	3	3	7764.86	0
318	1	47	2	2	92	112	73	0.821429	3	1	3	2	5	1	1	1	1	2	1	2	2	2	3	3	3166.94	0
319	2	53	2	1	82	179	113	0.458101	2	1	2	1	1	3	1	2	2	2	2	2	1	1	1	1	44202.4	0
320	2	74	1	2	82	179	113	0.458101	2	1	2	2	1	4	2	1	1	1	2	2	2	2	3	3	6973.45	0
321	1	61	1	5	96	88	57	1.09091	2	1	3	2	1	8	1	2	1	2	2	2	1	1	1	1	15195.5	0
322	1	44	2	5	96	88	57	1.09091	2	1	3	1	1	14	1	2	2	2	2	2	1	1	2	2	36577.8	0
323	1	76	1	5	130	116	79	1.12069	2	1	1	2	5	14	1	2	2	2	1	2	1	2	3	3	20519	0
324	1	46	2	1	73	107	73	0.682243	2	1	3	3	1	6	1	1	2	1	2	2	1	1	2	2	14960.4	0
325	1	57	2	1	105	106	60	0.990566	2	1	2	2	1	10	1	2	1	1	2	2	2	2	3	3	15488.3	0
326	1	57	2	5	63	106	72	0.59434	2	1	4	2	1	3	1	2	2	2	1	2	2	2	3	3	4426.71	0
327	1	57	2	1	74	81	37	0.91358	2	1	1	1	1	5	1	1	2	2	1	2	2	2	3	3	10568.6	0
328	1	57	2	3	122	100	47	1.22	2	1	2	2	1	7	1	1	2	2	1	2	2	2	3	3	13249.8	0
329	1	57	2	3	78	144	74	0.541667	2	1	3	2	1	3	1	1	2	2	1	2	2	2	3	3	5269.47	0
330	2	59	2	1	84	126	68	0.666667	2	1	3	1	1	6	1	1	2	2	2	2	1	1	1	2	11555.9	0
331	1	22	2	1	103	90	64	1.14444	2	1	1	2	4	4	1	2	2	2	2	2	1	1	2	1	22617.3	0
332	1	51	2	2	129	115	82	1.12174	2	1	3	3	1	8	1	1	2	2	2	2	1	1	1	2	30458.6	0
333	2	80	1	3	123	142	87	0.866197	2	1	1	3	1	8	1	2	1	2	1	2	1	1	1	1	23858.6	0
334	1	45	2	4	106	104	71	1.01923	2	1	2	3	1	11	1	1	1	2	2	2	1	1	1	2	32406.8	0
335	1	71	1	4	105	142	74	0.739437	2	1	1	1	1	3	1	2	1	2	2	1	2	2	3	3	9075.08	0
336	1	76	1	3	117	143	76	0.818182	2	2	4	2	1	4	1	2	2	1	2	2	2	2	3	3	10166.4	0
337	1	68	1	1	119	119	83	1	2	1	2	1	1	5	1	2	2	2	1	2	1	1	1	1	15092	0
338	1	77	1	3	142	146	126	0.972603	2	1	1	1	1	6	1	2	1	1	2	2	1	1	2	1	11573.6	0
339	1	81	1	3	142	146	126	0.972603	2	1	4	1	1	7	1	2	1	2	2	2	1	1	2	2	16376.7	0
340	2	78	1	1	69	142	70	0.485915	2	1	3	1	1	4	2	2	2	2	2	2	2	2	3	3	5061.88	0
341	2	73	1	2	106	137	82	0.773723	2	1	2	3	1	9	1	2	1	2	1	2	2	2	3	3	22488.8	0
342	1	48	2	1	135	78	52	1.73077	2	1	3	3	4	1	1	2	2	2	2	2	1	1	1	1	44871	1
343	1	82	1	1	66	106	47	0.622642	2	1	2	2	1	5	2	1	1	2	1	2	2	2	3	3	9020.31	0
344	1	53	2	4	81	102	75	0.794118	2	1	1	2	1	3	1	2	2	2	2	1	2	2	3	3	8398.66	0
345	1	63	1	2	91	117	63	0.777778	2	1	4	3	4	6	1	1	2	2	2	2	1	1	2	1	22635.2	0
346	2	71	1	2	70	148	42	0.472973	2	1	2	1	1	5	2	2	2	2	1	2	1	1	1	1	10986	0
347	1	18	2	1	82	84	42	0.97619	2	1	2	3	1	2	1	2	2	2	2	2	1	1	2	1	3480.67	0
348	1	80	1	3	100	132	55	0.757576	2	1	4	1	1	4	1	2	2	2	2	2	1	1	1	1	7557.89	0
349	1	80	1	3	89	138	68	0.644928	2	1	1	1	1	9	1	2	2	2	1	2	2	2	3	3	12606.5	0
350	1	81	1	3	80	136	71	0.588235	2	1	3	2	1	16	2	2	2	1	2	2	1	1	1	2	19958.3	0
351	2	75	1	1	79	143	64	0.552448	2	1	4	1	1	13	1	2	2	2	2	2	2	2	3	3	11061.1	0
352	2	77	1	1	111	115	46	0.965217	2	1	4	3	4	6	1	1	2	1	1	1	1	1	1	2	22153.3	1
353	2	70	1	1	84	113	49	0.743363	2	1	3	1	1	5	1	1	2	1	2	2	1	1	1	1	18801	0
354	1	82	1	1	89	155	81	0.574194	2	1	2	3	1	5	1	2	2	2	2	1	2	2	3	3	11127.8	0
355	1	84	1	1	97	84	57	1.15476	2	3	4	3	1	6	1	2	1	2	2	2	1	1	1	2	10424.1	0
356	2	82	1	4	101	107	49	0.943925	2	1	2	2	4	4	1	2	1	2	1	2	1	2	3	3	27386.4	0
357	1	82	1	1	120	71	43	1.69014	1	1	4	3	1	4	1	1	1	1	2	2	2	2	3	3	8133.67	1
358	1	49	2	5	97	157	87	0.617834	2	1	1	2	1	9	1	2	2	2	2	2	1	1	1	1	59524.7	0
359	1	76	1	3	108	118	69	0.915254	2	1	1	2	2	12	1	2	2	1	2	1	2	2	3	3	16592	0
360	1	80	1	1	66	176	62	0.375	2	1	3	2	1	1	1	1	1	2	1	2	2	2	3	3	3396.65	0
361	2	56	2	5	82	102	56	0.803922	2	1	2	1	1	5	1	2	2	2	2	2	1	1	1	1	16014	0
362	1	33	2	3	85	114	53	0.745614	2	1	1	1	1	4	2	2	2	2	2	2	1	1	1	1	17008.2	0
363	2	79	1	5	78	128	90	0.609375	2	1	1	2	1	12	1	1	1	2	2	2	1	1	2	1	25274	0
364	2	77	1	1	108	99	51	1.09091	2	1	4	2	1	6	1	1	1	2	2	2	1	1	1	2	33373	0
365	2	77	1	2	96	119	68	0.806723	2	1	1	2	4	8	1	1	1	2	2	2	1	2	3	3	100900	0
366	1	71	1	3	60	115	55	0.521739	2	1	1	1	1	6	1	2	1	2	2	2	1	1	1	1	8577.58	0
367	1	71	1	5	97	119	51	0.815126	2	1	4	1	1	4	1	2	2	2	2	2	1	1	1	1	13819.4	0
368	1	68	1	3	79	96	49	0.822917	2	1	2	2	1	2	1	2	1	2	2	2	1	1	1	1	5938.23	0
369	1	70	1	3	78	122	80	0.639344	2	1	1	2	4	3	1	2	1	2	1	2	1	1	2	2	21227.5	0
370	2	80	1	3	91	150	98	0.606667	2	1	3	1	1	5	1	2	2	2	1	2	1	1	1	1	11602.8	0
371	1	60	2	1	54	132	72	0.409091	2	1	1	1	1	8	1	2	1	2	1	2	1	1	1	1	12824.5	0
372	1	50	2	2	75	137	83	0.547445	3	1	2	2	1	3	2	1	2	1	2	2	1	1	2	1	4972.74	0
373	1	30	2	1	92	114	62	0.807018	2	1	3	2	1	19	1	2	2	2	2	2	1	1	1	1	134116	0
374	1	76	1	1	88	140	93	0.628571	2	1	4	3	1	10	1	2	1	2	2	2	1	1	2	1	16121	0
375	1	63	1	1	83	135	58	0.614815	2	1	1	2	1	7	1	2	2	2	2	1	2	2	3	3	10721	0
376	1	73	1	1	84	90	57	0.933333	2	1	3	2	2	8	1	2	2	2	2	2	1	1	1	2	14606.3	0
377	2	65	1	4	80	140	69	0.571429	2	1	3	3	1	6	2	1	2	2	1	2	2	2	3	3	5796.91	0
378	1	44	2	2	88	111	74	0.792793	2	1	4	3	1	4	1	2	2	2	2	2	1	1	1	1	5642.38	0
379	1	66	1	1	92	99	55	0.929293	2	1	3	1	1	8	1	1	1	2	1	2	1	1	2	2	16226.8	0
380	2	91	1	1	54	87	42	0.62069	2	1	4	1	1	13	1	2	2	2	2	2	2	2	3	3	21566.2	0
381	1	88	1	1	78	146	56	0.534247	2	1	1	1	1	15	1	2	2	1	1	2	1	1	2	2	29959.3	0
382	2	54	2	3	84	114	70	0.736842	2	1	4	1	5	4	1	2	2	2	2	2	1	1	2	1	6493.4	0
383	2	60	2	3	107	115	71	0.930435	2	1	3	2	1	9	1	2	2	2	2	2	1	1	1	1	23264.8	0
384	2	84	1	1	54	87	42	0.62069	2	1	3	1	3	10	2	2	1	2	2	1	2	2	3	3	9541.04	1
385	1	76	1	1	105	140	75	0.75	2	1	3	1	1	11	1	2	2	2	1	1	1	1	2	2	16591.9	0
386	2	88	1	3	81	143	61	0.566434	2	1	1	1	1	7	2	2	1	2	1	2	2	2	3	3	7863.27	0
387	2	62	1	1	81	95	53	0.852632	2	1	1	1	1	9	1	1	2	2	2	2	1	1	1	1	20897.4	0
388	1	66	1	1	94	89	63	1.05618	2	1	3	1	1	5	1	2	2	2	2	2	1	1	1	1	10812	0
389	1	55	2	2	72	148	91	0.486486	3	1	1	3	2	2	2	2	1	2	1	2	1	1	1	1	12582	0
390	2	82	1	1	88	111	54	0.792793	2	1	1	1	1	9	1	2	2	2	2	2	1	1	1	1	44921.8	0
391	1	91	1	2	117	118	77	0.991525	2	1	2	1	1	6	1	1	1	2	2	2	1	1	1	1	22056.2	0
392	1	78	1	5	95	108	57	0.87963	2	1	4	2	1	18	1	2	2	2	1	2	1	1	2	2	48048.3	0
393	2	71	1	2	100	165	101	0.606061	3	2	4	1	1	5	2	2	1	2	1	2	1	1	1	2	8463.88	0
394	2	65	1	5	65	143	70	0.454545	2	1	1	1	1	7	1	2	1	2	2	2	1	1	2	1	10513.6	0
395	1	68	1	5	97	135	58	0.718519	2	1	1	2	1	5	1	2	2	2	2	2	2	2	3	3	9788.37	0
396	1	68	1	3	89	120	58	0.741667	2	1	2	2	1	7	1	2	2	2	2	2	2	2	3	3	16752	0
397	1	69	1	3	109	119	73	0.915966	2	1	1	1	1	6	2	1	1	2	1	1	1	1	1	2	13350.1	0
398	2	93	1	1	89	153	76	0.581699	2	4	2	1	1	24	1	2	2	2	2	2	1	1	2	2	84577.6	0
399	1	73	1	1	92	98	61	0.938776	2	1	1	2	1	3	2	2	1	2	1	2	1	1	1	1	11310.5	0
400	1	35	2	5	78	109	57	0.715596	2	1	2	1	1	11	1	2	2	2	2	2	1	1	2	2	14550.4	0
401	1	33	2	2	102	127	81	0.80315	2	1	3	2	1	3	1	2	2	2	2	2	1	1	1	1	6472.95	0
402	1	61	1	2	86	176	69	0.488636	2	1	4	3	1	9	1	1	1	1	2	2	1	1	1	1	8837.42	0
403	1	63	1	5	78	109	57	0.715596	2	1	4	3	3	7	1	2	2	2	2	1	2	2	3	3	2202.82	0
404	2	76	1	3	94	146	71	0.643836	2	1	2	2	1	4	1	1	2	2	2	2	1	1	1	1	18067.3	0
405	1	43	2	3	79	113	71	0.699115	2	3	2	3	1	1	1	2	2	2	2	2	1	1	1	1	3893.46	0
406	2	55	2	1	111	113	65	0.982301	2	1	1	1	1	1	1	2	2	2	2	2	1	1	2	1	2154.65	0
407	1	26	2	2	81	119	79	0.680672	2	1	2	1	1	5	2	2	2	2	2	2	1	1	2	2	9799.68	0
408	1	26	2	3	99	97	66	1.02062	2	1	3	1	1	3	1	2	2	2	2	2	1	1	1	1	4580.66	0
409	1	66	1	2	71	144	89	0.493056	2	1	2	1	1	7	1	2	2	2	2	2	1	1	1	2	13075.8	0
410	1	68	1	1	91	106	70	0.858491	2	1	2	3	1	1	1	2	2	2	2	2	2	2	3	3	2511.6	0
411	1	49	2	5	96	91	61	1.05495	2	1	4	2	1	4	1	2	2	2	2	2	1	1	1	1	8739.72	0
412	2	86	1	1	85	123	63	0.691057	2	2	4	1	5	5	2	2	1	2	1	2	2	2	3	3	14378.4	0
413	1	69	1	5	96	91	61	1.05495	2	1	3	1	1	7	1	2	2	2	1	2	1	1	1	1	14911.1	0
414	1	56	2	5	88	139	75	0.633094	2	1	3	2	1	12	1	1	2	2	2	2	1	1	2	2	20313.1	0
415	1	88	1	1	115	129	61	0.891473	2	1	1	1	1	6	1	2	2	2	2	1	1	1	2	2	10907.4	0
416	1	68	1	4	110	149	87	0.738255	2	2	4	2	1	8	1	2	2	2	2	1	1	1	1	1	35426.7	0
417	1	81	1	1	74	128	65	0.578125	2	1	1	1	1	7	1	2	2	2	2	2	1	1	1	2	17735.2	0
418	1	48	2	1	95	121	69	0.785124	2	1	2	1	1	9	1	2	1	2	2	2	1	1	2	1	8068.5	0
419	2	91	1	1	85	162	97	0.524691	2	1	1	1	1	5	1	2	1	2	2	2	2	2	3	3	6231.12	0
420	1	50	2	1	125	150	76	0.833333	2	1	3	3	4	10	1	2	1	2	2	2	1	1	2	1	79902.9	0
421	1	56	2	1	89	152	95	0.585526	3	3	1	2	1	2	1	2	2	2	2	2	2	2	3	3	3154.22	0
422	1	63	1	3	96	131	67	0.732824	2	1	2	1	5	3	1	2	2	2	2	1	1	1	1	1	6124.16	0
423	2	81	1	3	85	177	76	0.480226	3	1	4	2	1	7	1	2	2	2	1	2	1	1	2	1	27544.8	0
424	1	85	1	1	86	119	61	0.722689	2	1	1	3	1	1	1	2	2	2	2	1	1	2	3	3	3193.12	1
425	2	60	2	2	122	140	98	0.871429	2	1	2	2	4	4	2	2	2	2	2	2	1	2	3	3	11022.5	0
426	1	70	1	5	79	112	73	0.705357	3	1	1	1	5	8	1	2	2	2	2	2	1	1	2	2	10547.3	0
427	1	63	1	4	117	121	78	0.966942	2	1	1	1	1	3	1	1	2	1	2	2	1	1	1	2	8648.26	0
428	1	63	1	2	120	129	71	0.930233	2	1	2	1	1	4	1	1	2	2	2	2	1	1	1	1	11565	0
429	1	63	1	4	115	168	98	0.684524	2	1	3	2	1	7	1	1	2	1	2	2	1	1	1	2	12579.2	0
430	1	63	1	4	121	176	97	0.6875	2	1	3	1	5	3	1	1	2	1	2	2	2	2	3	3	6999.34	0
431	2	71	1	2	95	158	71	0.601266	4	1	1	3	1	12	1	2	2	2	2	1	1	1	1	1	14244.9	0
432	1	73	1	4	74	117	61	0.632479	3	1	1	1	1	10	1	2	1	2	1	1	2	2	3	3	20958	0
433	1	69	1	2	122	140	98	0.871429	2	1	2	2	1	10	1	2	1	2	2	2	1	1	1	2	14377.7	0
434	1	45	2	1	100	87	48	1.14943	2	1	3	1	1	7	1	2	2	2	2	2	1	1	1	2	8330.14	0
435	2	89	1	1	98	161	83	0.608696	2	3	3	2	1	5	1	2	2	2	2	2	2	2	3	3	11215.6	0
436	2	64	1	1	100	87	48	1.14943	2	1	2	3	5	14	1	2	2	2	2	1	2	2	3	3	59102.3	0
437	1	59	2	1	85	131	76	0.648855	2	1	1	2	1	8	1	1	2	2	2	2	1	1	1	1	32579.7	0
438	1	87	1	2	89	125	64	0.712	2	1	3	2	1	9	1	2	1	2	1	2	1	1	1	1	12827	1
439	1	56	2	1	88	98	60	0.897959	2	1	2	1	1	10	2	2	1	2	1	2	1	1	1	1	24887.7	0
440	2	71	1	1	85	91	59	0.934066	2	1	1	2	1	11	1	2	2	2	2	2	1	1	2	1	39382.6	0
441	1	47	2	1	114	83	42	1.37349	2	1	3	2	1	4	1	2	2	2	2	2	1	1	1	2	7124.58	0
442	1	80	1	4	87	110	43	0.790909	2	1	1	3	1	6	1	2	2	2	2	2	1	1	1	1	12837	0
443	1	76	1	1	115	115	73	1	2	1	2	3	4	1	1	2	1	2	2	2	1	1	1	1	12584.9	0
444	2	92	1	4	92	156	65	0.589744	2	1	3	2	5	6	1	2	1	2	2	2	2	2	3	3	4416.13	0
445	2	79	1	3	97	126	46	0.769841	2	1	4	2	1	9	1	2	2	2	2	2	1	1	1	2	11693.4	0
446	1	71	1	5	102	117	59	0.871795	2	1	1	3	1	10	1	1	2	2	1	2	1	1	1	2	32304.8	0
447	2	83	1	4	178	119	73	1.4958	2	1	1	2	5	6	1	2	2	2	1	2	2	2	3	3	10333	0
448	1	65	1	3	82	143	89	0.573427	2	1	1	3	1	7	1	2	2	2	2	2	1	1	1	1	9196.88	0
449	2	60	2	3	100	83	56	1.20482	2	1	2	1	1	8	1	2	2	2	2	2	1	1	1	1	9499.7	0
450	1	49	2	1	85	91	59	0.934066	4	1	3	3	1	14	1	2	2	2	2	1	1	1	1	2	51111.1	0
451	1	71	1	1	89	117	66	0.760684	2	1	4	3	1	5	1	2	1	2	2	1	1	1	1	1	14074.9	0
452	1	70	1	4	102	119	61	0.857143	2	1	3	2	1	8	1	2	2	1	2	1	2	2	3	3	16956	0
453	2	76	1	2	64	105	47	0.609524	2	1	1	1	1	8	1	1	1	2	1	2	2	2	3	3	9652.12	0
454	2	73	1	1	106	138	87	0.768116	2	1	3	2	1	5	1	2	1	2	2	2	1	1	1	1	9763.52	0
455	1	61	1	1	80	96	66	0.833333	2	1	4	1	1	8	1	2	1	1	2	2	1	1	1	1	14260.5	0
456	2	90	1	1	51	113	50	0.451327	2	2	4	3	1	9	2	2	1	2	1	2	2	2	3	3	22520.8	0
457	1	39	2	3	105	135	93	0.777778	2	1	4	3	5	4	1	2	2	2	1	2	1	1	1	1	5953.92	0
458	2	76	1	2	85	166	80	0.512048	2	1	1	2	1	6	1	2	2	1	2	2	2	2	3	3	8265.58	0
459	2	76	1	1	131	127	77	1.0315	2	1	3	2	1	5	1	2	1	2	2	2	1	1	1	1	5819.27	0
460	1	45	2	5	78	156	87	0.5	2	1	1	1	1	4	1	1	1	2	2	2	1	1	1	1	11035.2	0
461	2	15	2	2	73	119	65	0.613445	3	1	1	2	1	6	1	2	2	2	2	2	1	1	1	1	10104.5	0
462	2	90	1	4	112	115	56	0.973913	2	1	3	1	1	14	1	2	2	2	2	2	1	1	2	2	15918.5	0
463	1	63	1	2	87	96	60	0.90625	2	1	2	2	1	8	1	2	1	2	2	2	1	1	1	1	12968.3	0
464	1	64	1	1	107	116	71	0.922414	2	1	2	1	1	4	1	1	1	2	1	2	1	1	1	1	4577.29	0
465	1	54	2	2	71	130	84	0.546154	2	2	4	2	1	4	1	2	2	2	2	2	1	2	3	3	19417.7	0
466	1	29	2	3	160	120	62	1.33333	2	4	4	3	1	11	1	2	2	2	2	2	1	1	1	2	14540.7	0
467	1	30	2	1	130	138	75	0.942029	2	3	1	1	1	1	1	2	2	2	2	2	2	2	3	3	5289	0
468	1	73	1	5	99	119	71	0.831933	2	1	3	2	1	6	1	2	2	2	2	1	1	1	1	1	10343.5	0
469	1	85	1	1	118	144	62	0.819444	2	1	2	3	4	34	1	2	2	1	2	2	1	1	1	1	173624	1
470	1	60	2	1	77	98	56	0.785714	2	1	1	1	1	8	1	2	1	2	2	2	1	1	2	2	22098.8	0
471	1	76	1	1	92	116	80	0.793103	3	1	2	1	3	11	1	2	2	2	2	1	1	1	1	2	61514.2	0
472	1	33	2	5	112	147	84	0.761905	2	2	4	2	1	5	1	2	2	2	2	2	1	1	1	1	6849.35	0
473	1	67	1	4	61	126	64	0.484127	2	1	2	3	4	9	1	2	2	2	2	2	1	1	2	1	76542	0
474	1	46	2	5	90	117	69	0.769231	2	1	1	3	1	4	1	2	2	2	2	2	1	1	1	1	22602.7	0
475	1	46	2	2	97	108	59	0.898148	2	1	3	1	1	6	1	2	2	2	2	2	2	2	3	3	9194.32	0
476	2	62	1	5	51	113	58	0.451327	2	1	1	1	1	3	1	2	2	1	2	2	1	1	1	1	5981.99	0
477	2	43	2	1	91	113	58	0.80531	2	1	3	1	1	4	2	2	2	2	2	2	1	1	2	1	9099.75	0
478	2	79	1	1	149	115	50	1.29565	2	1	4	2	4	5	2	2	1	1	1	2	1	2	3	3	26871.4	0
479	1	33	2	4	103	122	88	0.844262	2	1	2	1	1	6	1	2	2	2	2	2	1	1	2	1	9118.31	0
480	1	61	1	1	73	128	88	0.570312	2	1	1	2	1	6	1	2	1	2	2	2	1	1	1	1	7619.28	0
481	2	86	1	4	99	118	96	0.838983	2	1	1	2	1	6	1	2	2	1	1	2	2	2	3	3	11834.8	0
482	1	65	1	4	78	115	60	0.678261	2	1	4	2	4	9	1	2	2	2	1	2	1	1	1	1	35259.8	0
483	1	64	1	5	114	133	45	0.857143	2	1	1	1	1	6	1	2	1	2	1	2	1	1	2	2	7769.28	0
484	1	33	2	1	82	61	34	1.34426	2	1	1	2	4	1	1	2	2	2	2	2	1	1	1	1	54358.7	1
485	1	76	1	1	85	134	70	0.634328	2	1	3	2	1	16	1	2	2	1	2	2	1	1	2	1	14410	0
486	2	68	1	1	105	103	69	1.01942	2	1	4	3	1	5	1	2	2	2	2	2	1	1	2	2	12042.1	0
487	2	74	1	2	69	143	83	0.482517	4	1	3	1	5	19	1	2	2	1	2	2	1	1	2	2	32553.8	0
488	1	46	2	1	92	132	42	0.69697	2	1	3	3	1	6	1	2	2	2	2	2	1	1	1	1	10081.2	0
489	1	86	1	2	89	131	77	0.679389	2	1	1	1	1	5	1	1	1	1	1	2	1	1	1	2	15167.1	0
490	1	66	1	1	79	146	81	0.541096	2	1	3	3	1	5	1	2	1	2	1	2	1	1	1	1	9014.64	0
491	1	89	1	1	69	109	67	0.633028	2	1	3	1	1	4	2	2	1	1	2	1	2	2	3	3	7000.34	0
492	2	57	2	5	89	135	88	0.659259	2	1	1	1	1	3	1	2	1	2	2	2	1	1	1	2	5148.05	0
493	2	69	1	1	69	109	67	0.633028	2	1	3	3	1	6	1	1	2	2	2	2	2	2	3	3	19789.5	0
494	1	73	1	4	87	111	70	0.783784	2	1	1	1	1	4	1	2	2	2	2	1	1	1	1	2	8575.61	0
495	2	81	1	2	107	146	71	0.732877	2	2	4	2	5	11	1	2	2	1	2	2	1	1	2	2	11475.7	0
496	2	70	1	4	107	146	71	0.732877	2	1	2	2	3	7	1	2	2	2	2	1	2	2	3	3	4557.95	1
497	1	33	2	4	116	128	84	0.90625	2	1	2	2	1	14	1	2	2	2	2	2	1	1	2	2	29605.7	0
498	1	76	1	5	133	137	75	0.970803	2	1	4	1	1	12	1	2	1	2	2	1	1	1	1	1	18118.6	0
499	2	80	1	1	95	131	70	0.725191	2	1	3	1	1	6	1	1	1	2	2	2	2	2	3	3	12839.8	0
500	1	64	1	4	140	132	92	1.06061	2	1	3	1	1	8	1	1	2	2	2	2	1	1	1	1	12327.9	0
501	1	75	1	4	94	115	40	0.817391	2	1	4	2	1	86	1	2	2	2	2	2	1	1	1	2	283841	0
502	1	38	2	1	67	107	64	0.626168	2	1	4	2	1	7	1	2	2	2	2	2	1	1	1	2	11125.5	0
503	2	66	1	2	100	140	73	0.714286	2	1	3	1	1	6	1	2	1	2	2	2	1	1	1	1	6876.98	0
504	1	59	2	1	72	105	66	0.685714	2	1	3	2	1	4	1	2	2	2	2	2	1	1	1	2	11143.8	0
505	2	77	1	3	101	149	82	0.677852	2	1	4	2	1	8	1	1	2	2	2	2	1	1	1	1	15381	0
506	2	87	1	4	78	264	123	0.295455	2	1	1	1	1	6	1	2	1	2	1	2	2	2	3	3	14043.7	0
507	2	51	2	1	102	180	117	0.566667	2	1	2	2	1	7	1	1	1	2	2	2	2	2	3	3	15228.2	0
508	2	51	2	1	66	163	100	0.404908	2	1	2	1	1	13	1	1	2	2	2	2	1	2	3	3	20092.6	0
509	2	80	1	2	78	111	62	0.702703	2	1	3	2	1	6	1	2	2	2	2	2	1	1	1	1	23744.5	0
510	1	63	1	5	85	135	66	0.62963	2	1	2	1	1	6	1	1	1	2	2	1	1	1	1	1	13457.2	0
511	2	85	1	3	79	130	64	0.607692	2	2	4	1	5	7	1	2	2	1	2	2	2	2	3	3	14255.2	0
512	1	72	1	1	54	171	51	0.315789	2	1	4	1	1	12	1	2	1	1	1	2	2	2	3	3	15213.5	0
513	2	85	1	2	87	213	126	0.408451	2	1	1	1	1	4	1	2	1	2	1	2	2	2	3	3	10511.7	0
514	1	78	1	1	82	158	78	0.518987	2	1	2	3	1	4	2	2	2	2	1	2	2	2	3	3	9167.15	0
515	1	47	2	2	87	213	126	0.408451	2	1	2	1	1	7	2	2	2	2	1	2	2	2	3	3	8314.14	0
516	1	79	1	3	75	167	87	0.449102	2	1	1	2	1	6	1	1	1	1	2	2	1	1	1	1	9375.58	0
517	1	72	1	5	141	71	43	1.98592	1	1	2	2	4	2	1	2	2	2	2	1	1	2	3	3	21812.1	1
518	2	51	2	5	82	140	80	0.585714	2	1	2	1	1	3	1	2	1	2	2	2	1	1	1	1	7441.89	0
519	2	71	1	1	92	91	41	1.01099	2	1	1	3	4	4	1	1	2	1	2	2	1	1	1	1	73895.1	0
520	1	48	2	2	91	151	105	0.602649	3	1	2	1	1	6	1	2	2	2	2	2	1	1	2	1	5230.19	0
521	1	74	1	1	140	108	72	1.2963	1	1	1	1	4	33	1	2	1	1	1	2	1	1	1	1	146516	1
522	1	78	1	1	74	99	37	0.747475	2	1	4	1	5	3	1	2	2	2	2	1	1	2	3	3	8606.33	1
523	2	53	2	1	127	88	60	1.44318	2	1	2	1	1	6	1	1	2	2	2	2	1	1	1	1	15388.7	0
524	2	91	1	1	83	104	51	0.798077	2	1	2	1	4	2	1	1	2	2	1	1	1	2	3	3	22290.7	0
525	1	65	1	3	106	86	56	1.23256	2	1	1	3	1	5	1	2	1	1	2	2	1	1	1	1	7326.6	0
526	1	62	1	3	75	128	79	0.585938	2	1	3	1	4	7	1	2	2	2	2	2	1	1	1	1	60532.5	0
527	2	61	1	2	122	131	82	0.931298	2	1	4	1	1	7	1	2	2	1	2	2	1	1	1	1	12353.8	0
528	1	65	1	1	81	103	68	0.786408	2	1	3	1	1	7	1	2	1	1	2	2	1	1	2	1	12475.5	0
529	1	79	1	4	117	182	131	0.642857	2	1	1	3	5	3	1	1	2	2	2	2	2	2	3	3	11037.9	0
530	2	85	1	3	79	114	63	0.692982	2	1	1	2	1	15	1	1	2	2	2	1	2	2	3	3	26670.9	0
531	1	58	2	3	110	113	64	0.973451	2	1	2	1	5	3	1	2	2	2	1	2	1	2	3	3	27255.2	0
532	1	17	2	2	96	129	81	0.744186	3	1	1	1	1	4	1	2	2	2	2	2	1	1	1	2	4567.9	0
533	2	87	1	5	62	102	58	0.607843	2	1	3	2	1	12	1	2	1	1	2	2	1	2	3	3	28416.9	0
534	1	57	2	5	70	145	85	0.482759	2	1	2	3	1	5	1	2	2	2	2	2	1	1	1	1	14713.4	0
535	1	61	1	4	143	113	67	1.26549	2	1	4	2	1	5	1	2	2	2	1	2	1	1	1	2	4913.96	0
536	1	14	2	4	143	113	67	1.26549	2	1	4	1	1	7	1	2	2	2	2	2	1	1	2	2	9751.66	0
537	1	61	1	1	95	151	88	0.629139	4	1	1	1	1	7	1	2	1	2	1	2	1	1	1	2	9627.52	0
538	1	67	1	1	105	83	43	1.26506	2	1	2	1	1	5	1	2	2	2	2	2	1	1	2	1	9449.06	0
539	1	74	1	1	122	155	86	0.787097	2	1	1	1	5	3	1	1	1	1	1	2	2	2	3	3	11644.4	0
540	2	89	1	3	113	141	78	0.801418	2	1	4	2	1	4	2	2	1	1	2	2	1	1	2	2	5967.89	0
541	2	70	1	3	79	146	65	0.541096	2	1	4	1	1	4	1	2	2	2	1	2	1	1	1	1	6575.5	0
542	1	35	2	3	110	93	57	1.1828	2	3	1	3	1	2	1	2	2	2	2	2	1	1	1	2	4235.83	0
543	1	65	1	1	100	86	62	1.16279	2	1	1	1	1	4	1	2	2	1	2	1	2	2	3	3	11009.3	0
544	2	69	1	5	122	170	73	0.717647	2	1	4	1	1	14	1	1	1	2	2	2	1	1	1	2	43710.6	0
545	1	68	1	2	96	120	89	0.8	3	1	2	1	1	5	1	2	1	1	2	2	1	1	1	1	7205.44	0
546	1	29	2	3	124	149	96	0.832215	2	1	1	2	1	8	1	2	2	2	2	2	1	1	1	1	21990.1	0
547	1	29	2	5	107	126	71	0.849206	2	1	2	3	1	3	1	2	2	2	2	1	1	1	1	1	14492.7	0
548	1	29	2	3	123	116	72	1.06034	2	1	2	2	1	8	1	2	2	2	2	1	2	2	3	3	16606.6	0
549	1	55	2	3	99	97	59	1.02062	2	1	2	3	1	8	1	2	1	2	2	2	1	1	1	1	9168.03	0
550	1	34	2	5	81	129	95	0.627907	3	1	1	2	5	3	1	2	2	2	2	2	1	1	1	1	6087.22	0
551	2	72	1	4	78	129	56	0.604651	2	1	3	3	1	10	1	2	2	1	2	2	1	1	1	2	9608.81	0
552	2	61	1	5	110	171	80	0.643275	2	1	1	1	1	7	1	2	2	2	2	1	1	1	1	2	19738	0
553	1	72	1	4	74	164	136	0.45122	2	1	3	2	4	10	1	2	2	1	2	2	1	1	2	2	27065.4	0
554	1	60	2	1	86	130	74	0.661538	2	1	2	2	1	12	1	2	2	2	2	1	1	1	1	2	35866.9	0
555	1	57	2	1	124	144	85	0.861111	2	1	2	2	2	11	1	2	1	2	2	2	1	1	1	1	38278.2	0
556	1	53	2	3	94	128	78	0.734375	2	1	1	3	1	5	1	2	2	2	2	2	1	1	1	1	37492.8	0
557	1	81	1	1	103	91	59	1.13187	2	1	3	1	4	1	1	2	2	2	2	1	1	1	2	1	37742.9	1
558	1	73	1	2	83	121	62	0.68595	2	1	2	1	1	20	1	2	1	1	2	2	1	1	2	1	50558.5	0
559	1	87	1	3	99	99	50	1	2	1	2	1	1	15	1	2	2	2	2	2	1	1	1	1	18567	0
560	1	75	1	2	90	141	94	0.638298	3	1	3	2	4	1	2	2	1	1	2	1	1	1	1	1	9749.41	0
561	1	86	1	4	123	103	70	1.19417	2	2	4	2	1	10	1	2	1	1	1	2	2	2	3	3	19010.2	0
562	1	32	2	1	74	78	41	0.948718	2	1	1	2	1	7	1	2	2	2	2	2	1	1	2	2	12472.2	0
563	2	34	2	1	100	119	89	0.840336	2	1	1	2	1	8	1	2	2	2	2	2	1	1	1	2	12013.2	0
564	1	59	2	5	87	145	78	0.6	2	3	1	1	1	5	1	2	1	2	2	2	1	1	1	1	9437.62	0
565	1	57	2	5	86	96	62	0.895833	2	1	1	3	1	4	1	2	2	1	2	2	1	1	1	1	11718	0
566	1	50	2	5	113	126	86	0.896825	2	1	4	3	1	4	1	2	2	2	2	2	1	1	2	2	7112.2	0
567	1	73	1	1	93	158	97	0.588608	2	1	2	3	1	15	1	2	1	2	2	2	1	1	1	1	22945.9	0
568	1	71	1	3	119	117	81	1.01709	2	1	2	1	5	6	1	2	2	2	1	2	1	1	1	2	8492.05	0
569	1	44	2	3	120	162	109	0.740741	2	1	3	2	1	6	1	2	2	2	2	2	1	1	2	1	3929.23	0
570	1	65	1	2	126	139	108	0.906475	2	1	2	1	1	6	1	2	1	2	2	2	1	1	1	1	8364.51	0
571	1	65	1	1	93	124	41	0.75	2	1	3	1	1	8	1	2	1	2	2	2	2	2	3	3	8707.33	0
572	1	60	2	3	88	178	105	0.494382	2	1	1	2	1	5	1	2	2	2	1	2	1	1	1	2	5541.96	0
573	2	84	1	4	128	112	63	1.14286	2	1	1	2	4	11	1	2	1	2	1	1	1	1	2	1	114144	1
574	2	85	1	2	87	129	76	0.674419	2	1	3	1	4	2	1	2	1	2	1	1	1	2	3	3	17581.2	0
575	1	61	1	1	113	115	65	0.982609	2	1	3	1	1	8	1	2	1	2	2	2	1	1	1	1	10838	0
576	2	83	1	5	90	142	89	0.633803	3	1	3	1	1	15	2	2	1	2	2	1	2	2	3	3	24482.8	0
577	1	63	1	3	50	149	68	0.33557	2	1	4	2	1	12	1	1	1	2	2	1	2	2	3	3	17233.8	0
578	1	89	1	3	50	149	68	0.33557	2	1	3	3	1	4	1	1	2	2	2	2	2	2	3	3	4145.39	0
579	2	65	1	5	78	123	73	0.634146	2	1	1	1	5	5	2	2	1	2	2	2	1	1	1	1	11933.3	0
580	1	67	1	4	72	110	60	0.654545	3	3	3	2	5	1	1	2	2	2	2	1	2	2	3	3	637.31	0
581	1	83	1	1	92	103	49	0.893204	2	1	1	3	1	13	1	2	2	2	2	2	1	1	1	2	18123.5	0
582	1	39	2	2	90	108	66	0.833333	4	1	1	1	1	3	2	2	2	2	2	2	2	2	3	3	2994.27	0
583	1	48	2	2	97	120	73	0.808333	3	1	2	1	1	12	1	2	2	2	1	2	1	1	2	2	23609.3	0
584	1	22	2	4	105	113	69	0.929204	2	1	2	1	1	4	1	2	2	2	2	2	1	1	1	2	5752.34	0
585	1	79	1	3	65	126	72	0.515873	2	1	2	2	1	5	2	2	2	2	2	1	1	1	1	2	13393.7	0
586	2	91	1	5	108	121	48	0.892562	2	1	4	2	5	28	1	2	1	2	2	2	1	2	3	3	69933.4	0
587	2	71	1	2	106	105	66	1.00952	3	1	3	1	5	4	1	1	1	2	2	2	1	1	1	2	8849	0
588	1	80	1	5	107	94	39	1.1383	1	1	3	1	1	10	1	2	2	1	2	2	1	1	2	1	56660.7	1
589	1	68	1	1	80	120	80	0.666667	2	1	3	1	3	6	1	2	2	2	2	1	2	2	3	3	13080.9	1
590	2	68	1	2	88	152	89	0.578947	3	1	3	1	1	5	2	2	2	2	2	2	1	1	1	2	7182.31	0
591	1	56	2	2	75	130	70	0.576923	4	1	3	1	5	15	1	1	1	2	1	2	2	2	3	3	22480.4	0
592	1	34	2	3	103	114	70	0.903509	2	1	2	1	5	5	1	1	2	2	2	2	1	2	3	3	17829.6	0
593	1	63	1	1	93	99	63	0.939394	2	1	1	2	5	11	1	2	2	2	2	1	1	1	1	1	70981.4	0
594	1	59	2	3	65	96	63	0.677083	2	1	3	1	5	15	1	1	1	2	1	2	2	2	3	3	18664.6	0
595	1	44	2	3	70	123	68	0.569106	2	1	3	2	5	6	1	1	1	2	2	2	1	2	3	3	17703.8	0
596	2	60	2	1	96	105	69	0.914286	2	3	3	2	4	6	1	2	2	2	2	1	1	1	2	1	34135.9	0
597	1	35	2	3	75	128	86	0.585938	2	1	1	3	5	10	1	2	2	2	2	2	1	1	2	1	92010.2	0
598	2	89	1	1	90	80	53	1.125	2	1	4	1	5	9	1	1	2	2	1	2	2	2	3	3	16924	1
599	1	57	2	1	135	111	75	1.21622	2	1	3	2	4	11	1	2	2	2	1	2	1	1	1	2	106760	0
600	1	79	1	4	90	130	68	0.692308	3	1	2	1	1	5	1	2	1	1	1	2	2	2	3	3	18289	0
601	1	77	1	3	80	118	58	0.677966	2	1	4	2	1	7	1	1	1	1	1	2	1	1	1	2	10305.2	0
602	2	80	1	1	84	105	84	0.8	2	1	1	2	4	7	1	2	2	2	2	2	1	1	1	2	21975.3	0
603	1	73	1	1	120	100	62	1.2	2	1	3	1	4	7	1	1	2	1	2	2	1	1	1	2	57441.3	1
604	2	68	1	5	117	129	84	0.906977	2	1	1	1	1	6	2	1	2	2	2	2	1	1	1	1	7725.38	0
605	1	37	2	5	111	113	66	0.982301	2	1	2	1	1	5	1	2	2	2	2	2	1	1	1	1	12329.6	0
606	1	23	2	1	71	172	91	0.412791	2	1	1	1	1	7	1	2	2	2	2	2	1	1	1	1	11390.7	0
607	1	64	1	2	98	132	85	0.742424	3	1	2	1	1	6	1	2	2	2	2	1	1	1	1	1	19120.6	0
608	1	67	1	1	71	172	91	0.412791	2	1	2	1	5	7	2	2	1	1	1	2	1	2	3	3	30866.3	0
609	1	38	2	2	82	92	64	0.891304	2	2	4	2	1	16	1	2	2	2	2	1	1	1	1	1	53731.6	0
610	1	68	1	1	76	113	78	0.672566	2	1	1	2	1	24	1	2	2	2	2	1	1	1	1	2	92293	0
611	2	72	1	3	83	155	50	0.535484	2	1	4	2	5	4	1	1	1	2	2	2	2	2	3	3	6785.43	0
612	1	66	1	1	101	132	65	0.765152	2	1	2	1	1	8	1	1	1	1	2	2	2	2	3	3	23638.9	0
613	1	67	1	3	71	187	83	0.379679	2	1	3	1	1	5	1	2	2	2	2	2	1	1	1	1	15271.6	0
614	1	47	2	1	106	94	55	1.12766	2	1	3	1	1	8	1	2	2	2	2	2	2	2	3	3	23085.1	0
615	1	66	1	3	106	94	55	1.12766	2	1	4	2	4	7	1	2	2	2	2	2	1	1	1	2	65172.6	0
616	1	67	1	1	123	112	62	1.09821	2	1	2	2	1	1	1	2	2	2	2	1	2	2	3	3	2258.48	1
617	1	45	2	2	87	114	79	0.763158	3	1	3	3	1	15	1	2	2	2	2	1	1	1	1	1	21901.5	0
618	1	78	1	1	72	105	83	0.685714	2	2	4	2	5	3	1	1	1	1	2	2	1	2	3	3	124424	0
619	1	82	1	1	76	134	72	0.567164	2	1	2	1	5	25	1	1	1	1	1	2	2	2	3	3	41716.7	0
620	1	83	1	1	45	101	59	0.445545	1	1	1	1	1	23	1	2	2	2	1	2	1	1	1	2	54293.7	1
621	1	73	1	1	116	70	42	1.65714	2	1	3	3	4	7	1	2	2	2	2	1	1	1	2	1	63774.5	1
622	1	79	1	1	94	172	94	0.546512	2	1	4	2	1	6	1	2	2	1	2	2	1	1	2	2	13420.7	0
623	1	71	1	3	97	154	103	0.62987	2	1	2	1	1	5	2	2	1	1	2	2	1	1	1	2	9159.2	0
624	2	50	2	2	99	115	66	0.86087	2	1	3	3	1	14	1	2	2	2	2	1	2	2	3	3	22463.2	0
625	1	68	1	1	116	70	42	1.65714	2	1	2	1	4	11	1	1	1	1	2	2	1	1	1	1	65199.2	1
626	2	75	1	3	78	116	36	0.672414	2	1	2	1	1	4	1	2	2	2	2	2	1	1	1	1	9639.63	0
627	1	56	2	1	101	130	79	0.776923	2	1	1	2	5	7	1	2	2	2	1	2	1	1	2	2	7126.57	0
628	2	55	2	2	103	118	76	0.872881	2	2	4	2	2	10	1	2	2	2	2	2	2	2	3	3	9612.27	0
629	2	76	1	1	116	187	101	0.620321	2	1	1	2	1	5	1	1	1	1	1	2	2	2	3	3	12118.2	0
630	2	77	1	1	84	126	81	0.666667	2	1	3	2	1	22	1	1	1	1	1	2	2	2	3	3	30410.1	0
631	2	84	1	1	66	124	51	0.532258	2	1	2	2	1	12	1	2	2	1	1	2	1	1	2	2	27244.7	0
632	2	90	1	2	93	131	63	0.709924	3	1	4	2	1	8	2	2	2	2	2	2	1	1	1	2	14443.2	0
633	2	74	1	3	83	137	67	0.605839	4	1	1	3	1	6	2	2	2	2	1	2	1	1	1	2	8644.6	0
634	1	80	1	3	78	114	60	0.684211	2	1	1	2	1	16	1	2	2	2	2	1	1	1	2	2	46876.6	0
635	1	80	1	5	103	114	65	0.903509	2	4	1	1	1	19	2	2	2	2	2	1	2	2	3	3	42252.2	0
636	1	75	1	3	72	107	74	0.672897	2	1	1	1	5	4	1	2	2	2	2	2	1	1	1	1	6428.36	0
637	2	80	1	1	128	92	48	1.3913	1	1	3	3	4	20	1	2	1	1	2	2	1	2	3	3	45675.8	1
638	1	67	1	1	83	152	98	0.546053	2	3	4	1	1	28	1	2	2	2	2	1	1	1	1	1	117037	0
639	2	40	2	2	101	95	53	1.06316	3	1	2	2	5	6	1	2	2	2	2	2	1	1	1	2	11358.4	0
640	1	56	2	1	83	152	98	0.546053	2	3	3	3	5	1	1	2	1	2	2	2	2	2	3	3	2883.04	0
641	1	65	1	1	88	107	68	0.82243	2	1	2	1	3	21	1	2	1	1	1	1	2	2	3	3	42551.4	1
642	1	68	1	2	139	124	72	1.12097	2	1	3	1	5	9	1	1	2	2	2	2	2	2	3	3	13775.2	0
643	2	63	1	4	60	167	98	0.359281	2	1	2	3	5	7	1	2	1	2	2	2	2	2	3	3	7752	0
644	2	59	2	2	75	157	104	0.477707	3	1	1	3	1	5	2	2	1	2	2	2	1	1	1	1	9906.81	0
645	1	66	1	3	100	109	85	0.917431	2	1	1	3	1	28	1	2	2	2	1	2	1	1	2	1	41445.4	0
646	1	82	1	1	60	105	51	0.571429	2	1	2	2	1	3	1	2	2	2	2	1	2	2	3	3	9225.32	1
647	1	76	1	4	72	183	72	0.393443	2	4	2	1	5	34	1	2	1	2	1	2	1	2	3	3	389701	0
648	1	72	1	1	145	93	56	1.55914	2	1	3	2	4	3	2	1	1	2	2	2	1	2	3	3	14187.3	0
649	2	83	1	5	75	113	92	0.663717	2	1	3	1	5	5	2	2	2	1	2	2	2	2	3	3	9491.07	0
650	1	50	2	3	58	136	76	0.426471	2	1	2	2	1	21	2	2	2	2	2	2	1	1	1	2	40850.1	0
651	1	77	1	4	108	168	88	0.642857	2	1	4	2	1	22	1	2	1	2	2	1	1	1	1	2	91944.2	0
652	2	84	1	1	88	108	55	0.814815	2	1	2	3	5	8	2	1	1	1	1	2	2	2	3	3	14711.8	0
653	1	36	2	3	98	121	59	0.809917	4	1	2	1	2	2	2	2	2	2	2	2	2	2	3	3	5018.35	0
654	2	83	1	1	90	101	52	0.891089	2	1	4	2	5	7	1	1	2	1	1	2	1	2	3	3	32707	0
655	1	64	1	2	83	115	71	0.721739	2	1	3	1	5	13	1	1	2	2	1	2	1	2	3	3	18766.4	0
656	2	49	2	1	102	96	56	1.0625	2	1	4	1	1	5	1	2	2	2	2	1	2	2	3	3	17793.6	1
657	1	84	1	1	119	127	82	0.937008	2	2	4	2	5	16	2	1	2	1	2	2	2	2	3	3	33203.2	0
658	1	72	1	1	122	210	94	0.580952	2	1	3	2	4	3	1	2	1	1	1	2	1	2	3	3	36089	0
659	2	60	1	1	93	134	68	0.69403	2	2	4	2	1	13	1	2	2	2	2	2	1	1	2	1	43757	0
660	1	65	1	5	107	91	57	1.17582	2	1	2	3	5	5	1	1	1	2	1	2	2	2	3	3	13401.3	0
661	2	57	2	4	75	155	51	0.483871	2	1	3	1	4	6	1	2	2	2	2	1	1	1	1	2	68235.6	0
662	1	81	1	1	101	123	63	0.821138	2	2	4	2	5	1	1	2	2	1	2	2	1	2	3	3	8681.91	1
663	1	34	2	4	112	139	101	0.805755	2	4	3	3	1	11	1	1	2	2	2	2	1	1	2	2	44552.2	1
664	1	50	2	2	106	120	86	0.883333	2	1	3	3	4	6	1	2	1	2	1	2	1	1	2	2	11484	0
665	2	53	2	1	88	126	73	0.698413	2	1	2	1	1	9	1	2	2	2	1	2	2	2	3	3	14419.9	0
666	1	64	1	5	97	115	62	0.843478	2	1	4	1	1	13	1	2	1	2	1	2	1	2	3	3	40836.7	0
667	1	82	1	1	98	118	47	0.830508	2	1	1	2	1	5	1	2	2	2	2	1	1	1	2	2	12029	0
668	2	83	1	1	97	118	47	0.822034	3	1	1	1	1	5	1	2	2	2	2	1	2	2	3	3	19657.4	1
669	2	87	1	3	74	137	92	0.540146	2	1	4	2	1	9	2	1	1	1	2	2	1	1	1	1	25305	0
670	1	84	1	1	56	131	85	0.427481	2	1	3	1	5	3	2	2	2	2	2	1	1	1	1	2	6573.82	0
671	2	72	1	1	138	143	92	0.965035	2	1	2	3	3	1	1	2	2	2	2	1	2	2	3	3	385.28	1
672	1	80	1	1	110	113	60	0.973451	2	1	4	1	1	6	1	1	1	1	1	2	1	2	3	3	56932.6	0
673	1	71	1	5	112	101	61	1.10891	2	1	2	1	4	5	2	1	2	2	2	1	1	2	3	3	32674.2	0
674	1	85	1	4	98	103	42	0.951456	3	2	4	2	1	5	1	1	1	2	2	2	1	1	1	2	11348	0
675	2	88	1	5	60	119	65	0.504202	2	1	3	1	5	19	2	2	1	2	2	1	2	2	3	3	32626.2	1
676	1	70	1	3	116	124	53	0.935484	2	1	3	2	5	1	1	2	1	1	2	2	2	2	3	3	4425.6	0
677	1	78	1	1	77	116	78	0.663793	2	1	1	1	1	12	1	2	2	2	1	2	1	1	2	1	25459	0
678	1	54	2	1	77	116	79	0.663793	2	1	2	1	1	5	2	2	1	2	2	2	1	1	1	2	9988.6	0
679	1	79	1	2	65	118	77	0.550847	2	1	4	2	1	10	1	2	2	2	2	1	1	1	1	2	18637.1	0
680	1	68	1	1	63	106	54	0.59434	2	1	4	2	1	11	1	2	2	2	1	2	1	2	3	3	33353.4	0
681	1	54	2	1	86	115	58	0.747826	2	1	4	2	4	5	1	2	2	2	2	1	1	1	2	1	46175.8	0
682	1	63	1	4	130	113	91	1.15044	3	1	3	3	1	1	1	2	2	2	2	1	2	2	3	3	5891.16	1
683	1	86	1	1	88	150	64	0.586667	2	1	1	1	1	10	2	2	2	2	2	1	2	2	3	3	11305.3	1
684	1	86	1	1	88	150	64	0.586667	2	1	2	2	5	12	2	1	1	2	1	1	1	2	3	3	36196.8	0
685	1	75	1	5	73	132	75	0.55303	2	1	4	1	5	18	1	2	1	2	1	2	1	2	3	3	32444	0
686	2	59	2	3	75	192	106	0.390625	2	1	2	1	1	18	2	2	2	2	2	1	1	1	1	1	31009.1	0
687	1	54	2	2	108	133	87	0.81203	2	1	4	2	1	7	2	2	2	2	2	1	1	1	2	1	8894.65	0
688	1	78	1	5	73	132	75	0.55303	2	1	2	2	5	7	1	2	1	1	2	2	1	2	3	3	42698.5	0
689	2	79	1	1	138	141	85	0.978723	2	1	3	1	5	6	1	2	1	1	2	2	2	2	3	3	13228.2	0
690	1	49	2	5	122	107	70	1.14019	2	1	4	3	1	14	1	2	2	2	2	1	1	1	1	1	52967.8	1
691	1	73	1	1	102	117	65	0.871795	2	1	4	2	4	5	2	1	1	1	2	2	1	2	3	3	40626.1	1
692	2	60	2	4	95	99	74	0.959596	2	1	3	1	5	14	1	1	1	1	2	2	1	1	1	2	14602.6	0
693	2	34	2	3	83	106	71	0.783019	2	1	3	1	1	8	1	2	2	2	2	2	1	1	1	2	25034	0
694	2	77	1	5	95	129	59	0.736434	2	2	4	1	1	3	1	2	2	2	2	1	2	2	3	3	10610.5	1
695	1	68	1	1	90	156	90	0.576923	2	1	1	3	1	14	2	2	2	2	2	1	1	1	2	1	18013.4	0
696	1	47	2	3	66	113	63	0.584071	2	3	3	1	5	4	1	2	2	2	1	2	1	1	1	2	18956.9	0
697	1	60	1	1	101	240	141	0.420833	1	2	4	3	5	18	2	2	1	2	2	1	1	1	1	2	333004	1
698	2	74	1	4	57	121	65	0.471074	2	1	3	1	5	5	1	2	2	2	2	2	2	2	3	3	5712.34	0
699	2	70	1	2	59	128	72	0.460938	4	1	3	3	5	18	1	2	2	2	2	2	1	1	1	2	41798	0
700	1	81	1	1	98	92	41	1.06522	2	1	1	1	5	6	1	2	2	2	2	2	1	1	1	2	14435.1	0
701	1	47	2	1	132	141	94	0.93617	2	1	4	3	4	8	1	1	2	2	1	2	1	1	1	2	74759.3	0
702	1	62	1	1	87	115	75	0.756522	2	1	3	1	1	15	1	1	1	2	1	2	1	1	2	1	48392.6	0
703	1	81	1	1	95	102	53	0.931373	2	1	2	1	4	21	2	1	1	2	2	2	2	2	3	3	63694	0
704	1	55	2	1	80	118	74	0.677966	2	1	1	2	3	22	1	2	2	2	2	1	2	2	3	3	74516.2	1
705	2	72	1	4	93	106	58	0.877358	2	1	2	1	3	1	1	1	1	2	1	2	2	2	3	3	539.61	1
706	1	77	1	2	84	123	57	0.682927	4	1	4	1	1	7	2	2	1	1	2	2	1	1	1	1	9678.34	0
707	2	80	1	5	82	105	62	0.780952	2	1	3	1	1	3	1	2	1	2	2	2	2	2	3	3	8148.37	0
708	1	53	2	3	118	152	91	0.776316	2	1	4	2	4	4	1	2	1	2	2	2	1	1	2	1	18056.5	0
709	1	68	1	1	98	92	41	1.06522	2	1	4	2	4	5	1	1	1	1	2	2	1	1	2	1	74643	0
710	1	78	1	1	112	88	54	1.27273	2	3	1	1	5	13	1	1	1	2	2	2	2	2	3	3	34866.8	0
711	1	72	1	1	131	119	63	1.10084	1	1	1	1	1	7	1	2	1	2	2	2	2	2	3	3	44375.7	1
712	1	73	1	4	128	91	60	1.40659	2	1	3	2	5	10	1	2	2	2	2	2	1	2	3	3	13601.2	0
713	2	77	1	1	110	123	69	0.894309	2	1	1	1	1	7	2	2	1	2	2	2	1	1	1	2	9935.48	0
714	1	74	1	3	124	121	79	1.02479	2	1	2	3	4	1	1	2	1	2	1	1	1	1	2	1	40654.5	0
715	2	76	1	4	60	157	105	0.382166	2	1	2	2	5	9	1	2	1	1	2	2	1	1	1	2	7541.53	0
716	1	55	2	4	78	129	56	0.604651	2	1	2	1	5	10	1	2	1	2	2	2	1	2	3	3	31631.6	0
717	1	87	1	3	111	194	70	0.572165	2	1	3	2	1	5	1	2	1	2	1	2	1	1	2	2	15881.4	0
718	2	65	1	2	70	130	83	0.538462	4	1	1	1	5	6	1	2	2	2	1	2	1	1	1	2	7803	0
719	2	72	1	1	76	133	62	0.571429	2	1	3	3	5	4	1	2	2	2	1	2	1	2	3	3	21995.5	0
720	2	62	1	4	78	129	56	0.604651	2	1	3	1	1	13	1	2	2	2	2	1	1	1	2	2	32099.8	0
721	2	16	2	1	98	124	59	0.790323	2	1	2	1	5	8	2	2	2	2	2	2	1	2	3	3	7423.7	0
722	1	78	1	5	88	167	76	0.526946	2	1	3	1	4	9	1	2	2	2	1	2	1	1	1	1	60352.9	0
723	1	85	1	1	96	138	64	0.695652	2	1	4	3	1	1	1	2	2	2	2	1	2	2	3	3	3310.2	1
724	1	65	1	1	131	127	64	1.0315	1	1	4	1	4	5	1	2	1	1	2	2	1	2	3	3	38127.8	1
725	1	72	1	1	69	132	58	0.522727	2	1	1	3	2	24	1	1	1	1	1	2	1	1	1	1	289059	0
726	2	55	2	4	125	117	60	1.06838	3	1	2	1	5	14	1	1	2	2	2	2	2	2	3	3	23525.6	0
727	1	80	1	5	94	229	130	0.41048	2	2	4	2	1	6	1	2	2	2	2	2	1	1	1	1	7274.78	0
728	1	91	1	4	90	119	79	0.756303	2	1	3	1	1	1	1	2	2	2	2	2	2	2	3	3	885.91	0
729	1	46	2	2	124	129	78	0.96124	2	3	4	2	5	2	1	2	2	2	2	2	1	1	2	1	10510	0
730	1	80	1	1	91	131	62	0.694656	2	1	2	1	4	4	1	2	1	2	1	1	1	2	3	3	36368.9	1
731	2	72	1	5	123	148	95	0.831081	3	1	4	1	5	4	1	2	1	2	1	2	2	2	3	3	10540.5	1
732	2	88	1	1	79	182	84	0.434066	2	1	1	3	5	38	2	2	2	2	1	2	1	2	3	3	46340.2	1
733	1	78	1	1	79	182	84	0.434066	2	1	4	1	4	7	2	2	1	1	2	2	1	2	3	3	71788.5	0
734	1	52	2	5	108	121	48	0.892562	2	1	2	3	1	4	1	2	2	2	2	2	1	1	1	1	10249.7	0
735	1	63	1	2	77	86	46	0.895349	3	1	2	1	1	9	1	1	1	2	2	2	1	1	1	2	24203.2	0
736	2	17	2	3	97	110	66	0.881818	2	1	3	2	5	2	1	2	2	2	2	2	2	2	3	3	2554.32	0
737	2	77	1	1	90	201	114	0.447761	2	1	3	1	5	14	1	1	1	2	2	1	2	2	3	3	18209.8	0
738	1	77	1	4	113	136	81	0.830882	2	1	3	1	5	3	1	2	2	2	2	2	2	2	3	3	9573.2	1
739	1	78	1	1	80	155	60	0.516129	2	1	3	2	4	14	1	1	2	2	2	2	1	2	3	3	78564.2	0
740	2	69	1	3	75	104	73	0.721154	2	1	1	1	5	10	1	2	2	2	2	2	1	2	3	3	14925.8	0
741	2	53	2	2	54	156	91	0.346154	3	1	2	3	5	4	1	2	2	2	2	2	2	2	3	3	14245.8	0
742	1	83	1	5	70	130	70	0.538462	2	1	3	1	3	9	1	2	2	2	2	1	1	2	3	3	9042.53	1
743	1	29	2	2	104	108	74	0.962963	3	1	2	1	5	6	1	2	2	2	2	2	1	2	3	3	23817.8	0
744	1	51	2	5	72	157	108	0.458599	2	1	1	2	5	37	1	2	2	2	2	1	1	1	1	1	129902	0
745	1	63	1	2	112	180	65	0.622222	3	1	1	2	5	7	1	2	1	2	1	2	1	1	1	2	53034.1	0
746	2	79	1	1	100	112	65	0.892857	2	1	3	1	5	34	2	2	1	1	2	2	1	2	3	3	64356.7	0
747	2	63	1	1	82	170	70	0.482353	2	1	1	2	5	18	1	1	1	1	2	2	1	2	3	3	74288.2	0
748	2	63	1	1	69	154	62	0.448052	2	1	1	2	4	9	2	1	1	1	2	2	1	2	3	3	105137	0
749	1	71	1	1	52	138	84	0.376812	2	2	4	3	4	12	1	1	1	2	2	2	1	2	3	3	148498	1
750	2	73	1	5	80	100	50	0.8	2	2	4	1	3	2	2	2	1	1	1	1	2	2	3	3	4706.83	1
751	1	78	1	4	67	140	63	0.478571	2	1	3	3	5	10	1	2	2	1	1	2	1	2	3	3	24769.3	0
752	1	77	1	1	136	149	95	0.912752	2	1	3	2	1	6	2	2	2	2	2	2	1	1	1	2	15257.4	0
753	1	65	1	1	84	129	65	0.651163	2	1	4	1	5	7	1	1	1	1	2	2	2	2	3	3	16362.6	0
754	2	87	1	1	95	198	107	0.479798	2	1	2	1	5	12	1	2	1	2	2	2	2	2	3	3	17373.7	0
755	2	85	1	1	102	115	75	0.886957	2	1	1	1	1	18	1	1	1	2	1	2	1	2	3	3	190374	1
756	1	78	1	1	157	135	81	1.16296	2	1	3	1	4	5	1	2	2	2	2	1	1	2	3	3	30267.7	1
757	2	87	1	4	77	206	94	0.373786	2	1	3	2	1	12	1	2	1	2	2	2	2	2	3	3	18989.5	0
758	1	74	1	1	148	77	49	1.92208	2	3	1	2	4	2	1	2	2	2	2	1	1	2	3	3	18437.8	0
759	1	72	1	5	110	70	40	1.57143	2	1	1	2	3	3	2	1	1	2	1	1	2	2	3	3	16250.6	1
760	1	77	1	1	95	127	80	0.748031	2	1	4	1	1	7	1	2	2	2	2	2	1	1	1	2	13077.5	0
761	1	67	1	1	106	95	60	1.11579	2	2	4	1	1	6	2	2	2	2	2	1	2	2	3	3	7679.1	0
762	1	73	1	5	101	123	68	0.821138	2	1	2	1	5	15	1	2	1	1	2	2	1	1	1	1	129147	1
763	1	72	1	1	102	118	76	0.864407	2	1	1	3	5	10	1	2	1	2	1	2	2	2	3	3	16966.8	0
764	1	35	2	3	111	160	114	0.69375	2	1	1	3	4	1	1	1	1	2	2	2	1	2	3	3	8961.04	0
765	2	73	1	4	91	80	47	1.1375	2	1	1	1	1	15	1	1	1	2	2	1	1	2	3	3	35504.4	1
766	1	69	1	2	102	154	79	0.662338	2	1	3	2	4	1	1	1	1	2	1	2	1	2	3	3	5778.75	0
767	2	57	2	4	91	80	47	1.1375	2	1	1	1	1	17	1	1	2	2	2	2	1	2	3	3	24916.7	0
768	2	77	1	1	101	141	69	0.716312	2	1	1	1	4	6	1	1	2	1	1	2	1	2	3	3	61560.2	0
769	2	87	1	1	91	152	75	0.598684	2	1	2	2	4	2	2	2	1	1	2	2	1	2	3	3	13312.6	0
770	1	54	2	5	110	115	78	0.956522	2	1	1	2	3	7	1	2	2	2	2	1	1	1	1	2	36128.2	1
771	1	81	1	1	82	200	89	0.41	2	1	3	2	5	14	1	1	1	1	2	2	2	2	3	3	21048	0
772	1	97	1	5	85	133	80	0.639098	3	2	4	1	5	28	1	2	2	1	2	2	2	2	3	3	55825.8	0
773	1	76	1	4	104	122	63	0.852459	2	1	1	2	5	4	1	2	1	2	2	2	2	2	3	3	4821.25	0
774	2	78	1	4	140	130	71	1.07692	2	1	3	2	5	7	2	1	1	1	1	2	1	1	1	2	14204.9	0
775	1	65	1	5	76	100	53	0.76	2	1	4	2	5	12	1	1	1	1	1	2	1	2	3	3	24034.1	0
776	2	35	2	1	73	143	73	0.51049	2	1	4	1	5	8	1	2	2	2	2	2	1	2	3	3	19295.5	0
777	1	78	1	2	77	77	50	1	1	1	2	1	4	5	1	2	2	2	1	2	1	2	3	3	73060.1	1
778	1	52	2	2	94	87	52	1.08046	3	1	2	1	5	7	1	2	2	2	1	2	1	1	2	2	49098.3	0
779	1	59	2	5	76	100	53	0.76	2	1	1	1	5	7	2	2	2	2	2	1	2	2	3	3	15458.3	0
780	1	73	1	5	109	105	83	1.0381	2	1	1	2	4	13	2	2	1	1	2	1	1	2	3	3	91623.7	0
781	1	79	1	1	100	191	111	0.52356	2	1	2	2	5	11	1	1	2	1	2	2	1	2	3	3	28858.2	0
782	1	74	1	4	90	107	65	0.841121	2	1	3	2	1	10	1	2	2	2	2	1	1	1	1	2	13531.9	0
783	2	68	1	2	82	130	90	0.630769	3	1	2	1	3	1	2	2	1	1	1	1	2	2	3	3	5248.48	0
784	2	54	2	1	85	168	77	0.505952	2	2	4	2	1	9	1	1	1	2	2	2	2	2	3	3	14859	0
785	1	69	1	3	103	141	81	0.730496	2	1	1	1	1	25	1	2	2	2	2	1	1	1	1	2	110275	0
786	1	71	1	1	85	160	79	0.53125	2	1	4	1	5	1	1	2	2	1	2	2	1	2	3	3	6258.15	0
787	2	88	1	1	89	147	79	0.605442	2	1	4	1	5	10	1	1	2	2	1	1	1	2	3	3	63910.3	0
788	1	82	1	5	81	117	70	0.692308	2	1	2	1	5	23	1	2	1	2	2	2	2	2	3	3	36607	1
789	1	68	1	2	64	149	95	0.42953	3	1	4	2	5	6	1	2	1	1	2	2	2	2	3	3	6135.8	0
790	2	74	1	1	122	167	98	0.730539	2	1	4	2	1	10	1	1	2	2	2	2	1	2	3	3	29733.5	0
791	1	76	1	1	92	116	80	0.793103	3	1	2	1	3	1	1	2	2	1	2	1	2	2	3	3	521.3	1
792	1	61	1	2	92	154	95	0.597403	2	1	1	3	5	1	1	2	1	2	2	2	1	2	3	3	2465.1	1
793	1	31	2	3	124	120	68	1.03333	2	1	2	2	5	23	1	2	2	2	2	2	1	2	3	3	72141.1	0
794	1	22	2	1	129	145	84	0.889655	3	1	3	2	1	9	1	1	2	2	2	2	2	2	3	3	11004.8	0
795	2	75	1	2	80	120	80	0.666667	4	1	3	1	3	6	1	1	1	2	1	1	1	2	3	3	14133.2	0
796	2	75	1	2	80	120	80	0.666667	4	1	3	1	3	14	1	1	1	2	1	1	2	2	3	3	28278.8	0
797	1	50	2	1	120	105	59	1.14286	2	1	4	2	1	3	1	2	2	2	2	1	2	2	3	3	7961.47	0
798	1	75	1	2	85	123	52	0.691057	2	1	4	1	5	12	1	1	1	1	2	2	2	2	3	3	18704.6	0
799	1	73	1	1	79	139	75	0.568345	2	1	1	1	5	18	1	1	1	2	1	2	2	2	3	3	16441.6	0
800	1	66	1	2	112	131	88	0.854962	2	1	4	2	3	7	2	2	1	1	2	1	2	2	3	3	6022.96	0
801	1	71	1	1	92	143	68	0.643357	2	1	1	1	1	20	1	2	2	1	1	2	1	1	1	2	149532	0
802	2	54	2	3	113	141	78	0.801418	2	2	4	1	1	4	2	2	2	2	2	1	2	2	3	3	4898.06	0
803	1	60	2	1	136	107	43	1.27103	2	1	3	2	2	23	1	1	2	2	2	2	1	1	1	1	59733.3	0
804	1	73	1	3	76	146	80	0.520548	2	1	3	3	1	6	1	2	2	2	1	2	2	2	3	3	8208.46	0
805	1	65	1	5	113	141	78	0.801418	3	1	1	2	1	24	1	2	2	1	2	1	2	2	3	3	59790.7	1
806	1	46	2	3	112	166	100	0.674699	2	1	4	3	4	4	1	2	2	2	2	2	1	1	1	1	30479.2	0
807	1	72	1	3	83	91	66	0.912088	2	1	2	2	5	6	1	1	1	1	2	2	2	2	3	3	9628.25	0
808	1	74	1	1	122	123	66	0.99187	2	1	4	2	5	22	1	2	2	2	2	2	1	1	2	2	42872.1	0
809	2	63	1	2	85	112	81	0.758929	3	1	3	2	2	14	2	2	2	2	2	2	2	2	3	3	6447.99	0
811	1	69	1	2	120	133	75	0.902256	3	4	1	2	5	19	2	1	1	1	1	2	1	1	1	2	21567.4	0
812	2	25	2	1	91	85	57	1.07059	2	1	3	2	1	9	2	2	2	2	2	2	1	1	1	2	12893.2	0
813	2	63	1	2	98	149	86	0.657718	3	1	4	2	1	26	2	1	1	1	2	2	1	1	1	2	22103.8	0
814	2	32	2	2	92	121	81	0.760331	4	1	2	3	1	3	2	2	2	2	2	2	1	1	1	1	3290.04	0
815	2	52	2	3	94	120	75	0.783333	2	1	1	1	2	7	2	2	2	2	2	1	1	1	2	2	7680.38	0
816	2	64	1	2	75	131	70	0.572519	4	1	1	1	1	6	2	2	2	2	2	1	1	1	1	2	8138.8	0
817	2	37	2	2	84	110	63	0.763636	4	1	1	3	2	5	2	2	2	2	2	2	1	1	1	1	12204.3	0
818	2	63	1	2	76	135	82	0.562963	3	1	4	1	5	7	2	2	2	2	2	2	1	1	1	1	15440.3	0
819	1	52	2	2	80	120	80	0.666667	4	2	4	1	2	3	2	2	2	1	1	2	2	2	3	3	3023.44	0
820	1	75	1	2	74	139	79	0.532374	2	1	3	1	1	4	2	2	2	2	2	2	1	1	1	2	6472.22	0
821	1	68	1	3	91	102	47	0.892157	2	1	3	1	1	6	2	1	2	1	2	2	1	1	1	2	12934.5	0
822	1	53	2	2	84	118	73	0.711864	4	1	1	3	2	5	2	2	2	2	2	1	1	1	1	2	11907.9	0
823	2	33	2	2	83	154	98	0.538961	3	1	2	1	1	3	2	2	2	2	2	2	2	2	3	3	1507.98	0
824	1	86	1	2	60	172	87	0.348837	3	1	3	1	1	3	2	2	2	2	2	2	1	1	1	2	4568.76	0
825	1	31	2	2	80	120	80	0.666667	4	1	2	2	2	5	2	2	2	2	2	2	1	1	1	2	12010.1	0
826	1	26	2	2	74	120	71	0.616667	4	3	4	2	1	3	2	2	2	2	2	2	1	1	1	1	3889.03	0
827	1	50	2	1	69	134	102	0.514925	3	1	4	2	5	18	2	1	2	2	2	2	1	1	1	1	27360.4	0
828	1	33	2	2	89	184	107	0.483696	4	1	3	1	1	4	2	2	2	2	2	2	1	1	1	2	10745.4	0
829	1	36	2	2	75	110	70	0.681818	4	3	3	2	2	5	2	2	2	2	2	2	1	1	1	1	9977.25	0
830	1	34	2	3	105	106	62	0.990566	2	1	1	1	1	5	2	2	2	2	2	2	1	1	1	1	12678.2	0
831	2	72	1	1	108	187	123	0.57754	2	1	1	1	2	5	2	2	1	2	2	2	2	2	3	3	4215.85	0
832	1	33	2	3	82	158	100	0.518987	2	1	2	2	2	10	2	2	2	2	2	2	1	1	1	2	15881.2	0
833	1	75	1	2	62	126	78	0.492063	2	1	2	2	1	5	2	2	2	2	2	2	1	1	1	2	10899.1	0
834	2	25	2	1	61	166	80	0.36747	2	3	1	2	2	4	2	2	2	2	2	2	1	1	1	1	15636.4	0
835	1	36	2	5	70	130	78	0.538462	2	3	3	3	2	2	2	2	1	2	2	2	2	2	3	3	525.26	0
836	1	54	2	1	77	97	78	0.793814	2	1	1	3	2	5	2	1	2	2	1	1	1	1	1	2	5593.16	0
837	1	31	2	5	75	110	73	0.681818	2	3	3	3	2	1	2	2	2	2	2	2	2	2	3	3	270.32	0
838	2	31	2	2	70	132	78	0.530303	4	1	1	2	5	2	2	2	2	2	2	2	2	2	3	3	3551.02	0
839	2	79	1	3	68	128	76	0.53125	2	1	1	1	1	3	2	2	2	1	1	2	1	1	1	2	5448.29	0
840	1	36	2	5	108	152	110	0.710526	2	1	1	2	5	15	2	2	2	2	2	2	1	1	1	2	11941.6	0
841	2	33	2	5	124	124	68	1	2	3	1	1	5	2	2	2	2	2	2	2	2	2	3	3	4211.73	0
842	2	34	2	2	84	135	77	0.622222	4	3	2	1	2	1	2	2	2	2	2	2	2	2	3	3	1922.64	0
843	2	26	2	3	89	100	64	0.89	3	1	1	2	1	10	2	2	2	2	2	2	1	1	1	2	6947.39	0
844	2	61	1	2	77	113	64	0.681416	4	1	2	3	1	8	2	2	2	2	2	2	1	1	1	2	11395.7	0
845	2	61	1	2	86	114	71	0.754386	4	1	2	1	1	13	2	2	1	2	2	2	1	1	1	2	17021	0
846	2	69	1	2	91	129	79	0.705426	4	1	4	1	1	4	1	2	2	2	2	2	1	1	1	1	6034.44	0
847	2	62	1	2	82	136	83	0.602941	4	1	3	2	5	5	1	2	1	2	1	2	1	1	1	2	9923.81	0
848	1	36	2	2	84	106	75	0.792453	3	3	2	2	5	3	2	2	2	2	2	2	2	2	3	3	1331.77	0
